# Supplementary material
Source: PubMed Central journal article supplement (PMC1308920)
Supplement: pnas_0508952102_2.pdf [file pnas_0508952102_2.pdf]

**Table 4. Genes differentially expressed  $\geq 10$ -fold between donor cells and NT embryos**

| Up-Regulated in NT Embryos |                 |             |                         | Up-Regulated in Donor Cells |                 |             |                         |
|----------------------------|-----------------|-------------|-------------------------|-----------------------------|-----------------|-------------|-------------------------|
| Symbol                     | Seq. Identifier | UniGene ID* | Fold $\Delta^{\dagger}$ | Symbol                      | Seq. Identifier | UniGene ID* | Fold $\Delta^{\dagger}$ |
| <i>KRT18</i>               | BF045923        | Hs.406013   | 116.5                   | <i>CTSK</i>                 | AW464548        | Hs.83942    | 81.5                    |
| <i>GCNT2</i>               | AW465114        | Hs.934      | 49.5                    | <i>FMOD</i>                 | AW462954        | Hs.442844   | 79.2                    |
|                            | BF044514        | Hs.519367   | 42.3                    | <i>C8orf4</i>               | BF041835        | Hs.283683   | 73                      |
| <i>GCA</i>                 | BF042173        | Hs.377894   | 41.2                    | <i>DDR2</i>                 | BF040874        | Hs.440905   | 71.2                    |
|                            | AW466184        | Hs.491848   | 40.8                    | <i>CAV1</i>                 | BF045543        | Hs.74034    | 67.9                    |
| <i>CD48</i>                | BF043735        | Hs.901      | 39.1                    | <i>DCN</i>                  | AW464991        | Hs.156316   | 62.6                    |
| <i>FLJ20171</i>            | BF045047        | Hs.24743    | 34.1                    | <i>FLRT2</i>                | BF045130        | Hs.48998    | 61.8                    |
| <i>PTGS2</i>               | AW462092        | Hs.196384   | 31.6                    | <i>COL3A1</i>               | AW464442        | Hs.443625   | 51.1                    |
| <i>RANBP3</i>              | BF039596        | Hs.176657   | 31.6                    | <i>CD47</i>                 | BF042652        | Hs.446414   | 48.4                    |
|                            | BF041834        | Bt.23516    | 29.3                    | <i>SCA1</i>                 | BF044458        | Hs.434961   | 47.6                    |
| <i>MAD2L1</i>              | BF039606        | Hs.79078    | 28.7                    | <i>COL1A2</i>               | BF041697        | Hs.232115   | 45.6                    |
|                            | BF040595        | Bt.23516    | 26.7                    | <i>EPAS1</i>                | AW461996        | Hs.8136     | 43.8                    |
| <i>AQP3</i>                | BF040026        | Hs.234642   | 26.4                    |                             | BF042469        | TC191194    | 43.5                    |
| <i>RHPN2</i>               | BF042073        | Hs.335798   | 26.2                    |                             | AW463280        | Bt.22083    | 39.4                    |
| <i>T1A-2</i>               | BF041289        | Hs.468675   | 25.6                    | <i>FHL1</i>                 | BF040253        | Hs.421383   | 32.9                    |
|                            | BM365311        | Bt.10879    | 24.5                    | <i>PDGFC</i>                | BF045152        | Hs.43080    | 31.4                    |
| <i>FLJ22761</i>            | BF039994        | Hs.445459   | 24.2                    |                             | AW463041        | Hs.193784   | 30.2                    |
| <i>FLJ21816</i>            | BF043478        | Hs.444664   | 23.8                    | <i>PLS3</i>                 | AW462747        | Hs.430166   | 28.6                    |
| <i>ENPEP</i>               | AW466079        | Hs.435765   | 23                      | <i>ARHGAP9</i>              | BF041844        | Hs.437126   | 28.4                    |
| <i>LRP2</i>                | AW464520        | Hs.252938   | 22.8                    | <i>TIMP3</i>                | AW466116        | Hs.245188   | 26.9                    |
| <i>KIF4A</i>               | BM362620        | Hs.279766   | 22.4                    | <i>ME1</i>                  | BF041340        | Hs.14732    | 25.8                    |
| <i>F11R</i>                | AW464837        | Hs.414880   | 22.2                    | <i>FLJ90798</i>             | BF039909        | Hs.28264    | 25.7                    |
|                            | BF039365        | Bt.10169    | 21.4                    |                             | BF041028        | TC212143    | 24.9                    |
| <i>GALNT3</i>              | AW463251        | Hs.278611   | 20.6                    | <i>FSTL1</i>                | BF044377        | Hs.433622   | 24.8                    |
| <i>ODC1</i>                | BF043697        | Hs.443409   | 20.1                    | <i>FBLN5</i>                | BF044875        | Hs.11494    | 24.7                    |
| <i>TMG4</i>                | BF041033        | Hs.471695   | 19.3                    | <i>FLJ14525</i>             | AW464986        | Hs.26812    | 24.5                    |
|                            | BM362357        | Bt.20905    | 17.1                    | <i>SPTBN1</i>               | BF042525        | Hs.205401   | 24                      |
| <i>DNMT3B</i>              | AW464642        | Hs.251673   | 16.6                    | <i>TIMP3</i>                | AW462558        | Hs.245188   | 23.9                    |
| <i>SLC7A8</i>              | AW464251        | Hs.22891    | 16.5                    | <i>EGR1</i>                 | AW465088        | Hs.326035   | 23.4                    |
| <i>LOC55971</i>            | BF045001        | Hs.23449    | 16.2                    | <i>CD44</i>                 | BF045864        | Hs.306278   | 23                      |
|                            | AW463193        |             | 15.7                    | <i>RPS9</i>                 | AW463130        | Hs.139876   | 22.9                    |
|                            | BM366853        | BM366853    | 15.4                    | <i>AKAP2</i>                | BF041120        | Hs.42322    | 21.9                    |
| <i>EFNB2</i>               | AW465656        | Hs.30942    | 15.3                    | <i>ETV5</i>                 | BF039090        | Hs.43697    | 21.8                    |
| <i>SORD</i>                | AW465736        | Hs.878      | 15.1                    | <i>ANXA5</i>                | BF041575        | Hs.145741   | 21.8                    |
| <i>TACSTD1</i>             | AW461992        | Hs.692      | 15.1                    | <i>MBNLI</i>                | AW465357        | Hs.28578    | 21.5                    |
| <i>IQGAP2</i>              | AW464325        | Hs.373980   | 15                      | <i>CIS</i>                  | BF044250        | Hs.458355   | 21.1                    |
|                            | BF042668        | BF042668    | 15                      | <i>TGFBR2</i>               | AW462227        | Hs.82028    | 20.7                    |
| <i>C21orf45</i>            | AW463565        | Hs.49932    | 15                      | <i>NT5E</i>                 | AW465608        | Hs.153952   | 20.3                    |
|                            | BF039937        | Hs.504172   | 14.6                    | <i>PLAGL1</i>               | BF042359        | Hs.132911   | 19.6                    |
| <i>TACSTD2</i>             | AW464668        | Hs.23582    | 14.2                    | <i>BHLHB2</i>               | AW462121        | Hs.171825   | 18.6                    |
| <i>Cd48</i>                | BM365897        | Mm.1738     | 14                      | <i>QSCN6</i>                | AW464672        | Hs.77266    | 18.6                    |
| <i>FLJ20273</i>            | AW461481        | Hs.95549    | 13.9                    | <i>MMP2</i>                 | BF039163        | Hs.367877   | 18.1                    |
| <i>CDC20</i>               | AW463493        | Hs.82906    | 13.8                    |                             | AW465165        | Hs.102495   | 18                      |
|                            | BF040144        | Bt.6457     | 13.5                    | <i>RAB31</i>                | AW464597        | Hs.223025   | 17.8                    |
| <i>GATA2</i>               | BF043343        | Hs.367725   | 13.3                    | <i>PPIC</i>                 | AW464749        | Hs.110364   | 17.6                    |
| <i>VGLL1</i>               | AW464366        | Hs.9030     | 13.2                    |                             | BF042149        | Hs.435132   | 17.6                    |
| <i>LEMD2</i>               | BF045537        | Hs.444845   | 13                      | <i>FOS</i>                  | AW462661        | Hs.25647    | 17.4                    |
| <i>SLC2A1</i>              | AW463536        | Hs.169902   | 13                      | <i>VIM</i>                  | BF042212        | Hs.435800   | 17.3                    |

|                  |          |           |      |                 |          |           |      |
|------------------|----------|-----------|------|-----------------|----------|-----------|------|
| <i>SLC39A8</i>   | BF045137 | Hs.284205 | 12.9 | <i>Ells1</i>    | BF045063 | Hs.7913   | 16.8 |
| <i>LOC284379</i> | BF041114 | Hs.405866 | 12.7 | <i>SPP1</i>     | BF042926 | Hs.313    | 16.4 |
| <i>SPIC</i>      | BM365637 | Hs.511791 | 12.5 | <i>LY96</i>     | BM366661 | Hs.69328  | 16.2 |
| <i>PGA5</i>      | AW465124 | Hs.432854 | 12.4 | <i>IFNGR2</i>   | BF043722 | Hs.409200 | 16   |
| <i>ZFP29</i>     | BF046066 | Hs.444502 | 12.4 | <i>AFG3L1</i>   | BF044093 | Hs.337620 | 15.4 |
| <i>KIAA1935</i>  | BF039434 | Hs.438789 | 12.4 | <i>TNC</i>      | BF039202 | Hs.98998  | 15.2 |
| <i>IQGAP2</i>    | BF045795 | Hs.373980 | 12.3 | <i>CCL26</i>    | BM365027 | Hs.131342 | 14.7 |
|                  | AW463423 | TC211021  | 12.2 | <i>GL009</i>    | AW462657 | Hs.24054  | 14.7 |
| <i>TJP2</i>      | BF045365 | Hs.75608  | 12.1 | <i>GATA3</i>    | BF046526 | Hs.169946 | 14.6 |
| <i>NASP</i>      | BF039280 | Hs.446206 | 12.1 | <i>KIAA1340</i> | AW461890 | Hs.284270 | 14.6 |
| <i>SLC7A8</i>    | AW462183 | Hs.22891  | 12.1 | <i>NBL1</i>     | BF039753 | Hs.439671 | 13.8 |
| <i>SLC2A14</i>   | AW463170 | Hs.401274 | 12   | <i>CCL2</i>     | AW462597 | Hs.303649 | 13.8 |
|                  | BF044039 | TC194474  | 11.9 |                 | AW463374 | Bt.13829  | 13.8 |
| <i>BASP1</i>     | AW462896 | Hs.511745 | 11.8 |                 | BF045509 | Hs.33032  | 13.6 |
| <i>GPR126</i>    | BF043001 | Hs.249747 | 11.7 | <i>PEPD</i>     | BF041804 | Hs.444207 | 13.5 |
| <i>MLP</i>       | AW464012 | Hs.75061  | 11.6 | <i>WNT4</i>     | AW462911 | Hs.302428 | 13.4 |
| <i>TIMM23</i>    | BF043914 | Hs.11866  | 11.6 | <i>DPYSL2</i>   | BM362088 | Hs.173381 | 13   |
| <i>MRPL48</i>    | BF039118 | Hs.82389  | 11.5 | <i>SERPINE1</i> | BF044893 | Hs.414795 | 13   |
| <i>CGI-41</i>    | BF044044 | Hs.512597 | 11.3 | <i>CSDA</i>     | AW462503 | Hs.221889 | 13   |
| <i>SLC25A5</i>   | AW463693 | Hs.79172  | 11.1 | <i>MITF</i>     | BF040850 | Hs.166017 | 12.9 |
| <i>INADL</i>     | AW462529 | Hs.436450 | 10.6 | <i>PTOV1</i>    | BF042680 | Hs.227429 | 12.8 |
| <i>SOAT1</i>     | AW466137 | Hs.446331 | 10.4 | <i>CIR</i>      | BM365265 | Hs.308680 | 12.6 |
| <i>SPEC2</i>     | AW462199 | Hs.5985   | 10.3 | <i>MANIC1</i>   | BF041990 | Hs.8910   | 12.4 |
| <i>SLC25A5</i>   | AW463135 | Hs.79172  | 10.3 | <i>UBE2VI</i>   | BF046628 | Hs.381025 | 12.4 |
|                  | BF042046 |           | 10.3 | <i>ERG</i>      | AW463645 | Hs.45514  | 12.3 |
| <i>TACCI</i>     | BF041576 | Hs.279245 | 10.2 |                 | AW463223 | Hs.19218  | 12.3 |
| <i>DAPPI</i>     | BF043679 | Hs.62643  | 10.1 | <i>SPARC</i>    | BF039331 | Hs.111779 | 11.7 |
| <i>CYCS</i>      | AW464135 | Hs.437060 | 10   | <i>CHSI</i>     | AW462482 | Hs.130188 | 11.7 |
|                  |          |           |      | <i>PTPNSI</i>   | BF044338 | Hs.156114 | 11.6 |
|                  |          |           |      | <i>RIG</i>      | AW462599 | Hs.278503 | 11.5 |
|                  |          |           |      | <i>CHRNBI</i>   | BM366037 | Bt.5107   | 10.9 |
|                  |          |           |      | <i>MAFB</i>     | AW461546 | Hs.169487 | 10.8 |
|                  |          |           |      | <i>NNT</i>      | BM364482 | Hs.106620 | 10.8 |
|                  |          |           |      | <i>FLJ36175</i> | BF042461 | Hs.20848  | 10.7 |
|                  |          |           |      | <i>SGCE</i>     | AW465090 | Hs.409798 | 10.6 |
|                  |          |           |      | <i>XDH</i>      | BM363963 | Hs.250    | 10.4 |
|                  |          |           |      |                 | AW465686 | Bt.13829  | 10.4 |

\*Some sequences do not have human/mouse UniGene IDs and are annotated with the Cattle UniGene

names or the TIGR Cattle database or are previously unannotated sequences.

†Fold change represents the ratio of the embryos:standard reference divided by the ratio of the donor cells:standard reference.

‡Fold change represents the ratio of the donor cells:standard reference divided by the ratio of the embryos:standard reference.
