# Supplementary material
Source: PubMed Central journal article supplement (PMC1308920)
Supplement: pnas_0508952102_3.pdf [file pnas_0508952102_3.pdf]

**Table 5. Donor cells compared with NT embryos**

| Up-regulated in NT embryos <i>n</i> =795 |                 |             |                       | Up-regulated in donor cells <i>n</i> =751 |                 |             |                        |
|------------------------------------------|-----------------|-------------|-----------------------|-------------------------------------------|-----------------|-------------|------------------------|
| Symbol                                   | Seq. Identifier | UniGene ID* | Fold $\Delta^\dagger$ | Symbol                                    | Seq. Identifier | UniGene ID* | Fold $\Delta^\ddagger$ |
| <i>I01F6</i>                             | BF039704        | Hs.149443   | 2.1                   | <i>8-Sep</i>                              | AW465267        | Hs.307944   | 3.5                    |
| <i>I82-FIP</i>                           | AW465309        | Hs.355608   | 5.9                   | <i>1700012P16Rik</i>                      | AW464774        | Mm.218744   | 4.6                    |
| <i>ABCA1</i>                             | BF040532        | Hs.147259   | 3.1                   | <i>I82-FIP</i>                            | BF046420        | Hs.355608   | 2.6                    |
| <i>ABCC2</i>                             | AW465042        | Hs.193852   | 3.1                   | <i>AB026190</i>                           | BF043305        | Hs.106290   | 3.2                    |
| <i>ABCC5</i>                             | BM362093        | Hs.34744    | 9.7                   | <i>ABCC10</i>                             | AW461699        | Hs.55879    | 2.3                    |
| <i>ABCD3</i>                             | BF042967        | Hs.76781    | 3                     | <i>ABI-2</i>                              | BF039032        | Hs.387906   | 2.2                    |
| <i>ABHD6</i>                             | AW462708        | Hs.39056    | 2.6                   | <i>ACOX1</i>                              | AW465214        | Hs.379991   | 7.1                    |
| <i>ACAA1</i>                             | BF046493        | Hs.166160   | 2.3                   | <i>ACP33</i>                              | BF041695        | Hs.242458   | 2.1                    |
| <i>ACAS2L</i>                            | BF043956        | Bt.15996    | 4.8                   | <i>ACSL5</i>                              | BF039416        | Hs.11638    | 7.9                    |
| <i>ACLY</i>                              | AW464782        | Hs.387567   | 2.7                   | <i>ACTN1</i>                              | BF039521        | Hs.119000   | 2.2                    |
| <i>ACP5</i>                              | AW463855        | Hs.1211     | 5.6                   | <i>AD-020</i>                             | BF044610        | Hs.82933    | 2.7                    |
| <i>ACSL6</i>                             | AW464268        | Hs.14945    | 8.3                   | <i>ADAMTS1</i>                            | BF043048        | Hs.8230     | 2.7                    |
| <i>AF3P21</i>                            | BF043565        | Hs.102929   | 2.8                   | <i>ADAR</i>                               | AW463765        | Hs.7957     | 3                      |
| <i>AFTIPHILIN</i>                        | AW462194        | Hs.7942     | 2.9                   | <i>ADNP</i>                               | BM365941        | Hs.448540   | 5.8                    |
| <i>AGPAT3</i>                            | BF042280        | Hs.443657   | 4.4                   | <i>AFG3L1</i>                             | BF044093        | Hs.337620   | 15.4                   |
| <i>AGTRL2</i>                            | BF044923        | Hs.433156   | 2.7                   | <i>AGA</i>                                | AW462575        | Hs.207776   | 3.3                    |
| <i>AHCY</i>                              | AW462820        | Hs.388004   | 3.8                   | <i>AGPAT3</i>                             | BF042370        | Hs.443657   | 2.8                    |
| <i>AK3</i>                               | AW465803        | Hs.10862    | 4.6                   | <i>AHCYL1</i>                             | AW464967        | Hs.4113     | 2                      |
| <i>AKAP12</i>                            | AW463034        | Hs.197081   | 3.5                   | <i>AHNAK</i>                              | BF039701        | Hs.378738   | 2.2                    |
| <i>AKR1B1</i>                            | AW462009        | Hs.75313    | 4                     | <i>AIM1</i>                               | BF044762        | Hs.422550   | 5.5                    |
| <i>AKR7A3</i>                            | AW461500        | Hs.6980     | 2.1                   | <i>AKAP11</i>                             | BF045445        | Hs.414995   | 2.1                    |
| <i>ALAD</i>                              | AW462442        | Hs.1227     | 3.3                   | <i>AKAP2</i>                              | BF041120        | Hs.42322    | 21.9                   |
| <i>ALDOC</i>                             | AW462357        | Hs.155247   | 2.5                   | <i>AKAP8L</i>                             | AW466052        | Hs.96200    | 2.5                    |
| <i>AMD1</i>                              | BF046637        | Hs.159118   | 4.5                   | <i>AKR7A3</i>                             | AW465640        | Hs.6980     | 2.2                    |
| <i>ANP32E</i>                            | BF046443        | Hs.385913   | 2.9                   | <i>ALG5</i>                               | BF040851        | Hs.339428   | 2.9                    |
| <i>ANXA2</i>                             | AW466147        | Hs.462864   | 2                     | <i>AMFR</i>                               | BF041516        | Hs.295137   | 3                      |
| <i>ANXA8</i>                             | AW462193        | Hs.463110   | 3.3                   | <i>ANC_2H01</i>                           | BF039531        | Hs.22879    | 3.3                    |
| <i>ANXA8</i>                             | AW465301        | Bt.5026     | 2.4                   | <i>ANKRD1</i>                             | AW464818        | Hs.448589   | 4.4                    |
| <i>AP2B1</i>                             | AW464249        | Hs.370123   | 3.6                   | <i>ANKRD10</i>                            | BF045302        | Hs.164969   | 2                      |
| <i>AP4S1</i>                             | BF044230        | Hs.496614   | 2.4                   | <i>ANKRD12</i>                            | AW464401        | Hs.388877   | 2.6                    |
| <i>APEX1</i>                             | BF040000        | Hs.73722    | 2.1                   | <i>ANKRD25</i>                            | BF042341        | Hs.284208   | 4.9                    |
| <i>APLP2</i>                             | AW464890        | Hs.279518   | 2.8                   | <i>ANKRD27</i>                            | BF040592        | Hs.59236    | 2.4                    |
| <i>APOA1</i>                             | AW462476        | Hs.93194    | 3                     | <i>ANKRD28</i>                            | BF039515        | Hs.273104   | 2.2                    |
| <i>APPBP2</i>                            | BF046670        | Hs.84084    | 5.4                   | <i>ANPEP</i>                              | AW461514        | Hs.1239     | 2.9                    |
| <i>APRT</i>                              | BF044049        | Hs.28914    | 2                     | <i>ANXA11</i>                             | BF042214        | Bt.5150     | 2.9                    |
| <i>APXL</i>                              | BF045273        | Hs.2391     | 7.5                   | <i>ANXA11</i>                             | AW464058        | Hs.75510    | 2.4                    |
| <i>AQP3</i>                              | BF040026        | Hs.234642   | 26.4                  | <i>ANXA4</i>                              | AW461550        | Hs.422986   | 6                      |
| <i>ARF5</i>                              | AW464330        | Hs.430657   | 2.7                   | <i>ANXA5</i>                              | BF041575        | Hs.145741   | 21.8                   |
| <i>ARHGAP9</i>                           | BF046238        | Hs.437126   | 2.3                   | <i>ARHGAP9</i>                            | BF041844        | Hs.437126   | 28.4                   |
| <i>ARL10B</i>                            | AW462077        | Hs.348709   | 2.6                   | <i>ARHGEF12</i>                           | BF046696        | Hs.413112   | 4.6                    |
| <i>ARL6IP2</i>                           | AW464488        | Hs.370800   | 7.4                   | <i>ARHGEF3</i>                            | BF043067        | Hs.25951    | 3                      |
| <i>ARMET</i>                             | AW465227        | Hs.436446   | 2.7                   | <i>ARHQ</i>                               | BF044629        | Hs.442989   | 5.6                    |
| <i>ARPC5L</i>                            | AW461349        | Hs.132499   | 4.6                   | <i>ARK5</i>                               | BF045905        | Hs.200598   | 4.5                    |
| <i>ARPP-19</i>                           | BF045103        | Hs.7351     | 5.9                   | <i>ARL1</i>                               | AW463285        | Hs.372616   | 2.1                    |
| <i>ASF1A</i>                             | AW465932        | Hs.292316   | 3.1                   | <i>ARL7</i>                               | BF044311        | Hs.111554   | 2.4                    |
| <i>ASRGL1</i>                            | AW462206        | Hs.433197   | 5.3                   | <i>ARNT</i>                               | BF045592        | Hs.131494   | 6                      |
| <i>ATP11A</i>                            | BF046256        | Hs.29189    | 3.4                   | <i>ARPC5</i>                              | BF039187        | Hs.126222   | 2.6                    |
| <i>ATP1B3</i>                            | AW462679        | Hs.76941    | 5                     | <i>ASAH1</i>                              | AW461677        | Hs.324808   | 3.2                    |

|                  |          |           |      |                  |          |           |      |
|------------------|----------|-----------|------|------------------|----------|-----------|------|
| <i>ATP5A1</i>    | BF039512 | Hs.298280 | 3.1  | <i>ATF3</i>      | BF043007 | Hs.460    | 2.3  |
| <i>ATP5B</i>     | AW466055 | Hs.406510 | 2.7  | <i>ATF6</i>      | BF040108 | Hs.433046 | 2.7  |
| <i>ATP5F1</i>    | AW464381 | Hs.81634  | 3.3  | <i>AXL</i>       | AW465195 | Hs.83341  | 8.7  |
| <i>ATP5H</i>     | AW462319 | Hs.155728 | 2.2  | <i>BAG2</i>      | BM366740 | Hs.55220  | 4    |
| <i>ATP5J</i>     | AW464223 | Hs.246310 | 2.4  | <i>BCAP29</i>    | BF045258 | Hs.303787 | 3.7  |
| <i>ATP5O</i>     | BF041499 | Hs.409140 | 2.1  | <i>BCAR3</i>     | BF043710 | Hs.201993 | 5.5  |
| <i>ATP6AP1</i>   | AW465974 | Hs.6551   | 2.8  | <i>BFAR</i>      | BF040942 | Hs.435556 | 2.7  |
| <i>ATP6V1A</i>   | BF044729 | Hs.409131 | 5    | <i>BHLHB2</i>    | AW462121 | Hs.171825 | 18.6 |
| <i>ATP6V1B2</i>  | AW463255 | Hs.295917 | 3    | <i>BLP1</i>      | AW464609 | Hs.7471   | 2.3  |
| <i>AYP1</i>      | AW463302 | Hs.334800 | 2.4  | <i>BNIP3L</i>    | BF045133 | Hs.132955 | 6    |
| <i>B4GALT3</i>   | AW465328 | Hs.321231 | 4.8  | <i>BS69</i>      | BF040504 | Hs.145894 | 4.4  |
| <i>B4GALT5</i>   | BF040625 | Hs.107526 | 3.5  | <i>BTBD7</i>     | AW462492 | Hs.379758 | 4.4  |
| <i>BANF1</i>     | AW461442 | Hs.433759 | 2.4  | <i>BTEB1</i>     | AW462812 | Hs.150557 | 9.6  |
| <i>BASP1</i>     | AW462896 | Hs.511745 | 11.8 | <i>C10orf30</i>  | BF042123 | Hs.436344 | 6.7  |
| <i>BAT1</i>      | AW462165 | Hs.254042 | 2.7  | <i>C10orf74</i>  | BF045989 | Hs.352398 | 3.1  |
| <i>BAT4</i>      | BM364907 | Hs.247478 | 2    | <i>C12orf10</i>  | AW464916 | Hs.400801 | 4.1  |
| <i>BAT5</i>      | BF041056 | Hs.388188 | 2.2  | <i>C1orf24</i>   | BM364428 | Hs.48778  | 2.3  |
| <i>BAZ1B</i>     | AW463160 | Hs.194688 | 3.3  | <i>C1QTNF5</i>   | BF046067 | Hs.157211 | 3.5  |
| <i>BC004012</i>  | BF042883 | Mm.28347  | 10   | <i>C1R</i>       | BM365265 | Hs.308680 | 12.6 |
| <i>BCAS2</i>     | BF040123 | Hs.22960  | 3.1  | <i>C1S</i>       | BF044250 | Hs.458355 | 21.1 |
| <i>BCAT1</i>     | BF039683 | Hs.438993 | 4.1  | <i>C20orf108</i> | AW462065 | Hs.143736 | 2.5  |
| <i>BCL2L1</i>    | AW464309 | Hs.305890 | 3.6  | <i>C20orf140</i> | BF040011 | Hs.203514 | 2.8  |
| <i>BIG1</i>      | BF042236 | Hs.94631  | 5.7  | <i>C20orf9</i>   | BF042987 | Hs.24994  | 2.7  |
| <i>BIN2</i>      | BF043568 | Hs.14770  | 2    | <i>C21orf33</i>  | BF042591 | Hs.413482 | 4.1  |
| <i>BLM</i>       | AW463955 | Hs.383913 | 3.1  | <i>C21orf5</i>   | AW462239 | Hs.129781 | 2.6  |
| <i>BM-009</i>    | BF044372 | Hs.369973 | 3.6  | <i>C21orf66</i>  | AW462169 | Hs.297559 | 3    |
| <i>BRD4</i>      | BF046598 | Hs.278675 | 2.1  | <i>C2orf17</i>   | BF046119 | Hs.22412  | 2.9  |
| <i>BRRN1</i>     | AW464415 | Hs.308045 | 8.6  | <i>C2orf22</i>   | AW465208 | Hs.274415 | 2.3  |
| <i>BSPRY</i>     | BF041108 | Hs.108502 | 4.6  | <i>C3orf6</i>    | BF045000 | Hs.55098  | 2.7  |
| <i>BZW2</i>      | AW464734 | Hs.5216   | 3.4  | <i>C6orf89</i>   | BM362924 | Hs.433381 | 7.7  |
| <i>C10orf9</i>   | BF046378 | Hs.6820   | 2.4  | <i>C8orf4</i>    | BF041835 | Hs.283683 | 73   |
| <i>C14orf119</i> | AW464828 | Hs.303901 | 2.3  | <i>C9orf91</i>   | BF044011 | Hs.170226 | 5.6  |
| <i>C14orf58</i>  | AW461833 | Hs.267566 | 3.7  | <i>CA12</i>      | AW461641 | Hs.279916 | 2.2  |
| <i>C18B11</i>    | BF040115 | Hs.173311 | 3    | <i>CA2</i>       | AW464980 | Hs.155097 | 7.9  |
| <i>C19orf17</i>  | BF040765 | Hs.334641 | 2.6  | <i>CALD1</i>     | AW465282 | Hs.443811 | 7.4  |
| <i>C21orf45</i>  | AW463565 | Hs.49932  | 15   | <i>CALM1</i>     | BM366884 | Hs.282410 | 2    |
| <i>C4A</i>       | BF045738 | Hs.150833 | 2.5  | <i>CALU</i>      | BF045298 | Hs.7753   | 3.5  |
| <i>C6orf119</i>  | AW465061 | Hs.80624  | 2.4  | <i>CAST</i>      | AW463060 | Hs.440961 | 4.3  |
| <i>C6orf145</i>  | AW465632 | Hs.69388  | 2.8  | <i>CAT</i>       | AW463812 | Hs.395771 | 4.9  |
| <i>C6orf209</i>  | BF044136 | Hs.439494 | 2.3  | <i>CAVI</i>      | BF045543 | Hs.74034  | 67.9 |
| <i>C6orf67</i>   | BF042344 | Hs.108530 | 2.8  | <i>CCL2</i>      | AW462597 | Hs.303649 | 13.8 |
| <i>C6orf80</i>   | BF039298 | Hs.44468  | 2.7  | <i>CCL26</i>     | BM365027 | Hs.131342 | 14.7 |
| <i>C7orf30</i>   | BF043931 | Hs.87385  | 5.1  | <i>CCNI</i>      | AW462171 | Hs.369110 | 3.1  |
| <i>C9orf58</i>   | BM365207 | Hs.4944   | 4.1  | <i>CD109</i>     | BF040065 | Hs.94030  | 3.3  |
| <i>C9orf83</i>   | BF041658 | Hs.415534 | 2.2  | <i>CD3Z</i>      | BM366758 | Bt.4763   | 9.6  |
| <i>CA12</i>      | BF043907 | Hs.279916 | 2.3  | <i>CD44</i>      | BF045864 | Hs.306278 | 23   |
| <i>CALM2</i>     | AW462531 | Hs.425808 | 2.9  | <i>CD47</i>      | BF042652 | Hs.446414 | 48.4 |
| <i>CANX</i>      | BF044404 | Hs.155560 | 3.9  | <i>CD81</i>      | AW465486 | Hs.54457  | 2.1  |
| <i>CAPN6</i>     | AW465935 | Hs.169172 | 5.9  | <i>CDA11</i>     | AW463949 | Hs.429857 | 4.7  |
| <i>CCBL1</i>     | AW461608 | Hs.382311 | 3.3  | <i>CDC37</i>     | BF046007 | Hs.160958 | 2.1  |
| <i>CCDC5</i>     | AW465173 | Hs.436617 | 2.4  | <i>CDC42EP3</i>  | AW464998 | Hs.352554 | 8.2  |
| <i>CCNC</i>      | BF045762 | Hs.435450 | 3.2  | <i>CDKN1A</i>    | BF039111 | Hs.370771 | 4.2  |

|                |          |           |      |                      |          |           |      |
|----------------|----------|-----------|------|----------------------|----------|-----------|------|
| <i>CCNE1</i>   | BF045665 | Hs.244723 | 6.7  | <i>CDW92</i>         | BF041177 | Hs.414728 | 3.3  |
| <i>CCRN4L</i>  | BF042937 | Hs.436534 | 4.9  | <i>CDYL</i>          | BF043684 | Hs.16081  | 3    |
| <i>CCT2</i>    | AW465425 | Hs.189772 | 2.9  | <i>CEBPG</i>         | AW465166 | Hs.2227   | 3.2  |
| <i>CCT3</i>    | AW464746 | Hs.1708   | 2.9  | <i>CHIC2</i>         | BF040641 | Hs.259209 | 2    |
| <i>CCT8</i>    | BF040432 | Hs.416211 | 2.3  | <i>CHRDLI</i>        | BF039550 | Hs.440324 | 6.1  |
| <i>CD48</i>    | BF043735 | Hs.901    | 39.1 | <i>CHRNBI</i>        | BM366037 | Bt.5107   | 10.9 |
| <i>Cd48</i>    | BM365897 | Mm.1738   | 14   | <i>CHSI</i>          | AW462482 | Hs.130188 | 11.7 |
| <i>CD59</i>    | BF040446 | Hs.278573 | 2.5  | <i>CIZ1</i>          | BF042209 | Hs.23476  | 2.7  |
| <i>CD9</i>     | AW461966 | Hs.387579 | 2.2  | <i>CLN5</i>          | BF039545 | Hs.30213  | 2.8  |
| <i>CDC20</i>   | AW463493 | Hs.82906  | 13.8 | <i>CLNSIA</i>        | BF043957 | Hs.417369 | 6.8  |
| <i>CDC34</i>   | AW461687 | Hs.423615 | 3.3  | <i>COL1A2</i>        | BF041697 | Hs.232115 | 45.6 |
| <i>CDCA7</i>   | BF041522 | Hs.435733 | 3.4  | <i>COL3A1</i>        | AW464442 | Hs.443625 | 51.1 |
| <i>CDCA8</i>   | BF039863 | Hs.48855  | 7    | <i>COL5A2</i>        | AW463762 | Hs.283393 | 9.8  |
| <i>CDHI</i>    | AW463648 | Hs.194657 | 2.5  | <i>COPG2</i>         | BM362004 | Hs.258811 | 4.5  |
| <i>CDK7</i>    | BF044628 | Hs.184298 | 4.6  | <i>CRABP2</i>        | AW466200 | Hs.183650 | 2.3  |
| <i>CENPJ</i>   | BF041447 | Hs.434229 | 5.8  | <i>CREG</i>          | BM362069 | Hs.5710   | 6.3  |
| <i>CEPT1</i>   | BF042816 | Hs.363572 | 8.5  | <i>CRIM1</i>         | BF045277 | Hs.170752 | 9.9  |
| <i>CGI-100</i> | BF043542 | Hs.348996 | 2.7  | <i>CSDA</i>          | AW462503 | Hs.221889 | 13   |
| <i>CGI-27</i>  | AW464792 | Hs.438880 | 2.4  | <i>CSNK1A1</i>       | AW465807 | Hs.519667 | 2    |
| <i>CGI-41</i>  | BF044044 | Hs.512597 | 11.3 | <i>CSNK1G3</i>       | AW462731 | Hs.129206 | 2.5  |
| <i>CGI-85</i>  | AW464950 | Hs.442630 | 6.6  | <i>CST6</i>          | BF040853 | Hs.139389 | 4.6  |
| <i>CGI-94</i>  | AW465760 | Hs.111449 | 2.1  | <i>CT120</i>         | BF039086 | Hs.154396 | 8.4  |
| <i>CGN</i>     | BF042316 | Hs.18376  | 5.2  | <i>CTDSP2</i>        | BF046527 | Hs.355816 | 2.2  |
| <i>CHCHD2</i>  | AW465073 | Hs.389996 | 3.8  | <i>CTGF</i>          | AW462432 | Hs.410037 | 5.7  |
| <i>CIP29</i>   | AW462762 | Hs.410597 | 3.1  | <i>CTMP</i>          | BF039883 | Hs.293691 | 4    |
| <i>CIT</i>     | BF043570 | Hs.405932 | 5.5  | <i>CTSB</i>          | AW464470 | Bt.393    | 2.5  |
| <i>CITED1</i>  | AW465609 | Hs.40403  | 3.9  | <i>CTSK</i>          | AW464548 | Hs.83942  | 81.5 |
| <i>CKLFSF4</i> | BM366064 | Hs.325825 | 3.1  | <i>CTSS</i>          | BF044942 | Hs.181301 | 2.9  |
| <i>CKNI</i>    | AW465888 | Hs.32967  | 2.7  | <i>CXCL16</i>        | AW463646 | Hs.82407  | 6.1  |
| <i>CKS1B</i>   | AW463833 | Hs.374378 | 3.2  | <i>CXYORF1</i>       | AW461430 | Hs.446466 | 5.5  |
| <i>CLCN3</i>   | AW464787 | Hs.372528 | 5.3  | <i>CYB5-M</i>        | BF040355 | Hs.443495 | 2.1  |
| <i>CLDN4</i>   | AW465575 | Hs.5372   | 2.6  | <i>DAP</i>           | AW465882 | Hs.75189  | 3.9  |
| <i>CLIC1</i>   | BF046257 | Hs.414565 | 5.8  | <i>DAZAP2</i>        | AW464715 | Hs.369761 | 2.5  |
| <i>CLK2</i>    | AW462412 | Hs.73986  | 2    | <i>DCN</i>           | AW464991 | Hs.156316 | 62.6 |
| <i>CLTA</i>    | AW464992 | Hs.207052 | 3.6  | <i>DCTN2</i>         | AW462210 | Hs.289123 | 2    |
| <i>CNO</i>     | BF044812 | Hs.7570   | 2.3  | <i>DDR2</i>          | BF040874 | Hs.440905 | 71.2 |
| <i>COIL</i>    | AW463457 | Hs.966    | 2.5  | <i>DDX5</i>          | BF040554 | Hs.279806 | 4.1  |
| <i>COMMD2</i>  | AW461561 | Hs.432729 | 2.3  | <i>DHRS6</i>         | AW465820 | Hs.124696 | 6.4  |
| <i>COTLI</i>   | BF042957 | Hs.289092 | 2.7  | <i>DIP13B</i>        | AW463212 | Hs.370019 | 4.6  |
| <i>COX17</i>   | BM362515 | Hs.16297  | 2.5  | <i>DKFZP434A0225</i> | AW462850 | Hs.83293  | 2.5  |
| <i>COX6B</i>   | BM364927 | Hs.431668 | 2.5  | <i>DKFZp434D0215</i> | AW465570 | Hs.24715  | 2.8  |
| <i>COX7A2</i>  | BF039921 | Hs.70312  | 6.6  | <i>DKFZP434K046</i>  | BF043548 | Hs.444253 | 2.3  |
| <i>CPNE1</i>   | AW465029 | Hs.166887 | 3.6  | <i>DKFZP434N1923</i> | BF044836 | Hs.295866 | 8.4  |
| <i>CPNE3</i>   | AW462705 | Hs.14158  | 3.2  | <i>DKFZp547A023</i>  | AW464072 | Hs.374649 | 3.1  |
| <i>CRA</i>     | BF042724 | Hs.425144 | 5.4  | <i>DKFZP547N043</i>  | BF042319 | Hs.23971  | 3.1  |
| <i>CRIP1</i>   | BF041729 | Hs.423190 | 4.6  | <i>DKFZP566D193</i>  | AW465283 | Hs.106909 | 3    |
| <i>CRKL</i>    | AW465898 | Hs.5613   | 2.7  | <i>DKFZp761B128</i>  | BF042221 | Hs.61976  | 5.8  |
| <i>CRNKL1</i>  | AW465188 | Hs.171342 | 2.1  | <i>DKFZp761K1423</i> | BF044397 | Hs.236438 | 4.4  |
| <i>CSNK2A1</i> | BF040612 | Hs.446484 | 5    | <i>DMTF1</i>         | BF046571 | Hs.129506 | 3.1  |
| <i>CSRP2</i>   | AW463452 | Hs.10526  | 4.4  | <i>DNAJA4</i>        | AW462766 | Hs.76853  | 4.3  |
| <i>CSTB</i>    | AW462722 | Hs.695    | 3.1  | <i>DNAJCI</i>        | BF042292 | Hs.13015  | 2.4  |
| <i>CTBP2</i>   | BF044633 | Hs.171391 | 2.9  | <i>DNAJJC3</i>       | BF040929 | Hs.6019   | 2.3  |

|                      |          |           |      |                  |          |           |      |
|----------------------|----------|-----------|------|------------------|----------|-----------|------|
| <i>CTNND1</i>        | BF045618 | Hs.166011 | 2.6  | <i>DNASE2</i>    | AW464626 | Hs.118243 | 3.1  |
| <i>CTSL</i>          | BF045667 | Hs.418123 | 6    | <i>DNCL2A</i>    | BM364049 | Hs.100002 | 2.1  |
| <i>CTSZ</i>          | AW462127 | Hs.252549 | 2.1  | <i>DOC1</i>      | BF046207 | Hs.15432  | 3.5  |
| <i>CXX1</i>          | AW462811 | Hs.250708 | 9.7  | <i>DPI</i>       | BF039900 | Hs.173119 | 2.4  |
| <i>CYB5-M</i>        | AW465247 | Hs.443495 | 7.1  | <i>DPP7</i>      | BF043927 | Hs.37916  | 2.6  |
| <i>CYCS</i>          | AW464135 | Hs.437060 | 10   | <i>DPYSL2</i>    | BM362088 | Hs.173381 | 13   |
| <i>D1S155E</i>       | BM365429 | Hs.69855  | 3    | <i>DRCTNNB1A</i> | BF041741 | Hs.85603  | 2.1  |
| <i>DAPPI</i>         | BF043679 | Hs.62643  | 10.1 | <i>DREVI</i>     | AW463061 | Hs.279583 | 2.1  |
| <i>DC13</i>          | BF044728 | Hs.6879   | 2.9  | <i>DSCR1</i>     | BF041330 | Hs.282326 | 3.6  |
| <i>DC-TM4F2</i>      | AW465595 | Hs.509050 | 2.4  | <i>DUSP1</i>     | AW464709 | Hs.171695 | 3.8  |
| <i>DCXR</i>          | BF043899 | Hs.9857   | 2.5  | <i>DUSP12</i>    | BF042534 | Hs.416216 | 3.7  |
| <i>DDR1</i>          | AW465990 | Hs.423573 | 2.2  | <i>DUSP3</i>     | AW464118 | Hs.181046 | 3.4  |
| <i>DDX24</i>         | AW461868 | Hs.372267 | 2.5  | <i>DUSP6</i>     | BF040804 | Hs.298654 | 5.1  |
| <i>DDX39</i>         | BF043055 | Hs.311609 | 2.2  | <i>DUT</i>       | AW465805 | Hs.367676 | 2.3  |
| <i>DDX46</i>         | BF043409 | Hs.486709 | 2.1  | <i>EEF2K</i>     | BF041020 | Hs.259855 | 5.2  |
| <i>DHTKD1</i>        | BF039945 | Hs.501565 | 3.3  | <i>EFNA5</i>     | BF042122 | Hs.37142  | 7.3  |
| <i>DHX15</i>         | BF042942 | Hs.5683   | 2.4  | <i>EGR1</i>      | AW465088 | Hs.326035 | 23.4 |
| <i>DIAPH1</i>        | AW462364 | Hs.511896 | 2.4  | <i>EIF2C4</i>    | BF040889 | Hs.437864 | 2.4  |
| <i>DJ465N24.2.1</i>  | AW465717 | Hs.259412 | 2.3  | <i>EIF4B</i>     | AW465754 | Hs.93379  | 2.2  |
| <i>DKFZp434C0328</i> | AW465838 | Hs.24583  | 3.1  | <i>EIF4G3</i>    | AW462371 | Hs.402697 | 6.2  |
| <i>DKFZP434C212</i>  | AW462097 | Hs.287266 | 7.6  | <i>Ells1</i>     | BF045063 | Hs.7913   | 16.8 |
| <i>DKFZP434D146</i>  | BF040351 | Hs.240845 | 9.8  | <i>ENSA</i>      | BF044937 | Hs.511916 | 2.5  |
| <i>DKFZp434N2030</i> | BF045165 | Hs.494204 | 2.1  | <i>EPAS1</i>     | AW461996 | Hs.8136   | 43.8 |
| <i>DKFZP564I122</i>  | AW462778 | Hs.13024  | 2.4  | <i>EPM2AIP1</i>  | BM366281 | Hs.28020  | 2    |
| <i>DKFZP564O043</i>  | BF046098 | Hs.112605 | 2.9  | <i>ERCC1</i>     | AW463694 | Hs.435981 | 2    |
| <i>DKFZp761G058</i>  | BF043289 | Hs.291000 | 2.3  | <i>ERG</i>       | AW463645 | Hs.45514  | 12.3 |
| <i>DLD</i>           | AW464660 | Hs.74635  | 3.8  | <i>ESM1</i>      | BF041545 | Hs.410668 | 6.9  |
| <i>DNCLI2</i>        | AW462798 | Hs.369068 | 3.1  | <i>ETEA</i>      | AW462844 | Hs.76591  | 2.1  |
| <i>DNMT3A</i>        | BF044846 | Hs.241565 | 6.9  | <i>ETS1</i>      | BF043948 | Hs.18063  | 6.8  |
| <i>DNMT3B</i>        | AW464642 | Hs.251673 | 16.6 | <i>ETV5</i>      | BF039090 | Hs.43697  | 21.8 |
| <i>DPM2</i>          | AW463033 | Hs.108973 | 2    | <i>ETV6</i>      | BM364950 | Hs.171262 | 3.6  |
| <i>DSC2</i>          | AW464398 | Hs.95612  | 7.1  | <i>EXT1</i>      | AW464821 | Hs.184161 | 3.7  |
| <i>DTR</i>           | BF042729 | Hs.799    | 3.2  | <i>EXT2</i>      | BF044395 | Hs.75334  | 2.1  |
| <i>DUSP14</i>        | BF044131 | Hs.91448  | 2.5  | <i>FAM8A1</i>    | BF044631 | Hs.95260  | 5    |
| <i>DUSP16</i>        | AW466062 | Hs.20281  | 3.1  | <i>FBLN5</i>     | BF044875 | Hs.11494  | 24.7 |
| <i>DXS9928E</i>      | BF046010 | Hs.54277  | 2.8  | <i>FBXW1B</i>    | AW464815 | Hs.280385 | 2.1  |
| <i>ECT2</i>          | AW461921 | Hs.293257 | 2.4  | <i>FCGRT</i>     | BF043857 | Hs.111903 | 4.4  |
| <i>EFNB2</i>         | AW465656 | Hs.30942  | 15.3 | <i>FDX1</i>      | AW464063 | Hs.744    | 2.7  |
| <i>EHD1</i>          | BF045929 | Hs.155119 | 2.2  | <i>FEM1B</i>     | BF044699 | Hs.362733 | 2    |
| <i>EIF4A1</i>        | AW464970 | Hs.129673 | 2.2  | <i>FGFR2</i>     | AW464656 | Hs.404081 | 6.9  |
| <i>EIF4B</i>         | BF041358 | Hs.93379  | 2.5  | <i>FHL1</i>      | BF040253 | Hs.421383 | 32.9 |
| <i>ELKS</i>          | AW462178 | Hs.306711 | 4.8  | <i>FLJ10099</i>  | BF041934 | Hs.287955 | 3.9  |
| <i>EMP1</i>          | AW462081 | Hs.306692 | 2.4  | <i>FLJ10298</i>  | BF046016 | Hs.5999   | 4.7  |
| <i>ENAH</i>          | AW465964 | Hs.446693 | 2.5  | <i>FLJ10350</i>  | BF041610 | Hs.356096 | 4.6  |
| <i>ENPEP</i>         | AW466079 | Hs.435765 | 23   | <i>FLJ10359</i>  | BF045874 | Hs.257300 | 6.1  |
| <i>ENPP1</i>         | BF043889 | Hs.213840 | 9.4  | <i>FLJ11305</i>  | AW464810 | Hs.7049   | 2    |
| <i>ENPP4</i>         | BF041832 | Hs.54037  | 2.2  | <i>FLJ12716</i>  | BF041346 | Hs.443240 | 3.6  |
| <i>EP400</i>         | BF039981 | Hs.306094 | 2.1  | <i>FLJ13110</i>  | AW461945 | Hs.7358   | 3.5  |
| <i>EPB41L5</i>       | AW462087 | Hs.245773 | 2.3  | <i>FLJ14525</i>  | AW464986 | Hs.26812  | 24.5 |
| <i>EPHX2</i>         | BF046427 | Hs.212088 | 4.7  | <i>FLJ14753</i>  | BF040872 | Hs.13453  | 2.1  |
| <i>ETF1</i>          | BF043054 | Hs.77324  | 2.9  | <i>FLJ20152</i>  | BF042685 | Hs.82273  | 3.8  |
| <i>EVA1</i>          | AW462459 | Hs.116651 | 5.9  | <i>FLJ20160</i>  | BF045743 | Hs.418581 | 3    |

|                 |          |           |      |                  |          |           |      |
|-----------------|----------|-----------|------|------------------|----------|-----------|------|
| <i>EVL</i>      | AW464572 | Hs.241471 | 2.5  | <i>FLJ20308</i>  | BF040877 | Hs.356770 | 2.1  |
| <i>FL1R</i>     | AW464837 | Hs.414880 | 22.2 | <i>FLJ20647</i>  | AW461709 | Hs.234149 | 3.5  |
| <i>FABP5</i>    | AW464793 | Hs.408061 | 2.7  | <i>FLJ21439</i>  | BF042489 | Hs.431338 | 2.2  |
| <i>FADD</i>     | AW462721 | Hs.86131  | 8.7  | <i>FLJ22056</i>  | AW464426 | Hs.24956  | 2.8  |
| <i>FANCG</i>    | BF044266 | Hs.434873 | 2.7  | <i>FLJ23027</i>  | BF045699 | Hs.321766 | 2.8  |
| <i>FBLN2</i>    | AW463176 | Hs.198862 | 3.1  | <i>FLJ23221</i>  | AW465458 | Hs.91283  | 4.2  |
| <i>FGD4</i>     | AW463946 | Hs.409311 | 2.2  | <i>FLJ32954</i>  | BF040972 | Hs.9905   | 5.9  |
| <i>FKBP2</i>    | AW464896 | Hs.227729 | 2.3  | <i>FLJ36175</i>  | BF042461 | Hs.20848  | 10.7 |
| <i>FLJ10036</i> | AW463804 | Hs.21331  | 3.6  | <i>FLJ38482</i>  | BF046731 | Hs.436497 | 2.8  |
| <i>FLJ10188</i> | AW465559 | Hs.159066 | 7.5  | <i>FLJ90798</i>  | BF039909 | Hs.28264  | 25.7 |
| <i>FLJ10511</i> | AW462422 | Hs.106768 | 2.6  | <i>FLRT2</i>     | BF045130 | Hs.48998  | 61.8 |
| <i>FLJ10997</i> | AW465617 | Hs.27595  | 2.2  | <i>FMOD</i>      | AW462954 | Hs.442844 | 79.2 |
| <i>FLJ11806</i> | AW466113 | Hs.323443 | 2.8  | <i>FNBP1</i>     | BM364914 | Hs.440808 | 3.5  |
| <i>FLJ11848</i> | BF039440 | Hs.408526 | 2.6  | <i>FOS</i>       | AW462661 | Hs.25647  | 17.4 |
| <i>FLJ12439</i> | BF046293 | Hs.349905 | 6.2  | <i>FOSL2</i>     | AW465865 | Hs.301612 | 3    |
| <i>FLJ12525</i> | BF044559 | Hs.356573 | 2.5  | <i>FRAP1</i>     | AW462187 | Hs.338207 | 2.1  |
| <i>FLJ12903</i> | AW465796 | Hs.369253 | 2.6  | <i>FRG1</i>      | BM365030 | Hs.203772 | 2.3  |
| <i>FLJ13111</i> | BF040255 | Hs.288382 | 2.4  | <i>FSTL1</i>     | BF044377 | Hs.433622 | 24.8 |
| <i>FLJ13263</i> | AW464885 | Hs.288768 | 2.7  | <i>FUCA1</i>     | BM364586 | Hs.576    | 2.4  |
| <i>FLJ13576</i> | AW462963 | Hs.242327 | 3    | <i>FYCO1</i>     | BF044334 | Hs.257267 | 5.7  |
| <i>FLJ14502</i> | BF043801 | Hs.181466 | 3.7  | <i>GABARAPL1</i> | BF043830 | Hs.336429 | 2.1  |
| <i>FLJ14775</i> | AW461443 | Hs.334878 | 2.3  | <i>GAF1</i>      | BF041889 | Hs.24557  | 7.4  |
| <i>FLJ20171</i> | BF045047 | Hs.24743  | 34.1 | <i>GATA3</i>     | BF046526 | Hs.169946 | 14.6 |
| <i>FLJ20195</i> | BF045642 | Hs.286261 | 2.7  | <i>GL004</i>     | BF041356 | Hs.105166 | 3    |
| <i>FLJ20257</i> | BF040784 | Hs.178011 | 2.5  | <i>GL009</i>     | AW462657 | Hs.24054  | 14.7 |
| <i>FLJ20273</i> | AW461481 | Hs.95549  | 13.9 | <i>GLS</i>       | BF044339 | Hs.128410 | 5.6  |
| <i>FLJ20696</i> | BM364565 | Hs.236844 | 4.5  | <i>GMIP</i>      | AW465811 | Hs.49427  | 2.2  |
| <i>FLJ21816</i> | BF043478 | Hs.444664 | 23.8 | <i>GMRP-1</i>    | AW464552 | Hs.332382 | 2.2  |
| <i>FLJ21940</i> | BF040508 | Hs.283283 | 2.1  | <i>GNAI1</i>     | AW464185 | Hs.203862 | 3    |
| <i>FLJ22635</i> | BF042320 | Hs.353181 | 3.8  | <i>GNAS</i>      | AW465936 | Hs.157307 | 4    |
| <i>FLJ22761</i> | BF039994 | Hs.445459 | 24.2 | <i>GNG10</i>     | AW462436 | Hs.433898 | 3    |
| <i>FLJ22833</i> | AW463043 | Hs.118183 | 3.3  | <i>GNG11</i>     | BM361956 | Hs.83381  | 3.8  |
| <i>FLJ22875</i> | AW465512 | Hs.439548 | 3.1  | <i>GNG12</i>     | AW463227 | Hs.8107   | 4.6  |
| <i>FLJ23186</i> | BF046601 | Hs.434247 | 2.6  | <i>GNPDA2</i>    | AW463892 | Hs.511814 | 5.3  |
| <i>FLJ23476</i> | AW463671 | Hs.406462 | 2.4  | <i>GNS</i>       | AW461681 | Hs.334534 | 8.3  |
| <i>FLJ25555</i> | BF040173 | Hs.334715 | 2.5  | <i>GORASP1</i>   | BF040658 | Hs.250181 | 3.9  |
| <i>FLJ33318</i> | AW462444 | Hs.224630 | 2.6  | <i>GPBAR1</i>    | AW461516 | Hs.160954 | 2.1  |
| <i>FLJ38615</i> | BF039326 | Hs.130979 | 2.3  | <i>GPR21</i>     | BF045466 | Hs.55099  | 2.3  |
| <i>FLJ38663</i> | BF043867 | Hs.306825 | 2.1  | <i>GPR64</i>     | AW461648 | Hs.421137 | 2.8  |
| <i>FLJ40629</i> | BF042879 | Hs.99807  | 5.5  | <i>GRB10</i>     | BF041779 | Hs.512118 | 3.5  |
| <i>FLJ90652</i> | BF042201 | Hs.434864 | 3.8  | <i>GSN</i>       | BM366126 | Hs.446537 | 7.7  |
| <i>FLNB</i>     | BM366074 | Hs.81008  | 2.1  | <i>HDAC7A</i>    | BF043954 | Hs.200063 | 3.1  |
| <i>FLOT2</i>    | BM366445 | Hs.18799  | 2.7  | <i>HECA</i>      | AW464507 | Hs.6679   | 9.8  |
| <i>FOSB</i>     | AW463832 | Hs.75678  | 2.8  | <i>HIF1A</i>     | BF042862 | Hs.412416 | 4.2  |
| <i>FTHFSDC1</i> | BF041860 | Hs.44155  | 3.8  | <i>HNRPA2B1</i>  | BF044057 | Hs.232400 | 3.4  |
| <i>FUK</i>      | BF045361 | Hs.7907   | 5    | <i>HP1-BP74</i>  | BM362315 | Hs.142442 | 3.1  |
| <i>FZD4</i>     | AW463754 | Hs.19545  | 2    | <i>HRPT2</i>     | BF042593 | Hs.259502 | 6.6  |
| <i>GABPB2</i>   | BF045916 | Hs.181202 | 2.4  | <i>HSBP1</i>     | AW465284 | Hs.250899 | 3.6  |
| <i>GAGEC1</i>   | AW463108 | Hs.441038 | 3    | <i>HSPB8</i>     | BM364661 | Hs.111676 | 4.2  |
| <i>GALM</i>     | BF045563 | Hs.264610 | 4.9  | <i>HTGN29</i>    | AW463226 | Hs.283437 | 2    |
| <i>GALNT11</i>  | BF044774 | Hs.314421 | 3.1  | <i>HUS1</i>      | BF041015 | Hs.152983 | 2.1  |
| <i>GALNT3</i>   | AW463251 | Hs.278611 | 20.6 | <i>IFITM1</i>    | BF044991 | Bt.22978  | 5    |

|                  |          |           |      |                 |          |           |      |
|------------------|----------|-----------|------|-----------------|----------|-----------|------|
| <i>GATA2</i>     | BF043343 | Hs.367725 | 13.3 | <i>IFITM3</i>   | AW464847 | Hs.374650 | 4.4  |
| <i>GATA3</i>     | BF041614 | Hs.169946 | 7.8  | <i>IFNAR2</i>   | BF039697 | Hs.512211 | 6.4  |
| <i>GCA</i>       | BF042173 | Hs.377894 | 41.2 | <i>IFNGR2</i>   | BF043722 | Hs.409200 | 16   |
| <i>GCGR</i>      | AW464726 | Hs.208    | 2.7  | <i>IGF2R</i>    | AW461858 | Hs.76473  | 2.7  |
| <i>GCHI</i>      | BF039694 | Hs.86724  | 4.7  | <i>IGFBP4</i>   | BF042310 | Hs.1516   | 8.6  |
| <i>GCNT2</i>     | AW465114 | Hs.934    | 49.5 | <i>IL13RA1</i>  | AW464322 | Hs.285115 | 3.9  |
| <i>GITI</i>      | AW463852 | Hs.369441 | 2.4  | <i>IL27RA</i>   | BM366011 | Hs.132781 | 3.2  |
| <i>GK001</i>     | AW464413 | Hs.8207   | 2.4  | <i>IMMP2L</i>   | AW465739 | Hs.89576  | 4.9  |
| <i>GLRX</i>      | AW464405 | Hs.28988  | 2.9  | <i>IMPA2</i>    | AW461477 | Hs.5753   | 2    |
| <i>GMPR</i>      | BF041701 | Hs.1435   | 4.5  | <i>IPO8</i>     | AW463093 | Hs.316977 | 2.1  |
| <i>GOLGB1</i>    | BF039337 | Hs.445083 | 3.3  | <i>IQGAP1</i>   | BM365103 | Hs.1742   | 8    |
| <i>GPR126</i>    | BF043001 | Hs.249747 | 11.7 | <i>IRA1</i>     | BF045150 | Hs.438970 | 2.9  |
| <i>GRB2</i>      | BF045356 | Hs.411366 | 3.4  | <i>ISGF3G</i>   | BF039843 | Hs.1706   | 3.1  |
| <i>GRPEL1</i>    | BF040314 | Hs.151903 | 2.9  | <i>ITGAV</i>    | AW463037 | Hs.436873 | 3.2  |
| <i>GSR</i>       | AW465212 | Hs.414334 | 7.7  | <i>ITGB1</i>    | AW464270 | Hs.287797 | 3    |
| <i>H2AFZ</i>     | AW462567 | Hs.119192 | 3.8  | <i>ITGB5</i>    | AW461856 | Hs.149846 | 2.5  |
| <i>H3F3B</i>     | AW463254 | Hs.180877 | 2.6  | <i>ITGBL1</i>   | AW462195 | Hs.311054 | 4.2  |
| <i>HADH2</i>     | AW465125 | Hs.171280 | 4.6  | <i>ITSN2</i>    | BM366528 | Hs.444708 | 2.3  |
| <i>HAT1</i>      | AW464133 | Hs.13340  | 3.6  | <i>IVD</i>      | BM365899 | Hs.410396 | 3    |
| <i>HAX1</i>      | AW464671 | Hs.199625 | 2.1  | <i>JAK1</i>     | BM365700 | Hs.436004 | 2.7  |
| <i>HDAC1</i>     | BF040519 | Hs.88556  | 5.7  | <i>KDR</i>      | BF043170 | Hs.12337  | 4.7  |
| <i>HIG1</i>      | AW461980 | Hs.7917   | 2.4  | <i>KIAA0063</i> | BF042961 | Hs.3094   | 2.9  |
| <i>HIP2</i>      | AW464647 | Hs.246603 | 2.7  | <i>KIAA0082</i> | BF039787 | Hs.202331 | 2.1  |
| <i>HK2</i>       | BF043620 | Hs.406266 | 4.2  | <i>KIAA0141</i> | BM366146 | Hs.210532 | 3.1  |
| <i>HKE2</i>      | AW464404 | Hs.446374 | 2.5  | <i>KIAA0205</i> | BF045050 | Hs.3610   | 4.1  |
| <i>HMG2L1</i>    | BM366908 | Hs.92260  | 9.7  | <i>KIAA0226</i> | BF042503 | Hs.499355 | 2.2  |
| <i>HMGB1</i>     | AW464310 | Hs.434102 | 3.9  | <i>KIAA0280</i> | AW464897 | Hs.512248 | 2.9  |
| <i>HMGB2</i>     | BF043378 | Hs.434953 | 2.7  | <i>KIAA0373</i> | BF044427 | Hs.150444 | 6.8  |
| <i>HNI</i>       | AW462159 | Hs.109706 | 5    | <i>KIAA0586</i> | BM364639 | Hs.436921 | 3    |
| <i>HNRPA1</i>    | AW464603 | Hs.356721 | 2.4  | <i>KIAA0648</i> | BF043308 | Hs.31921  | 2.3  |
| <i>HNRPA2B1</i>  | AW464917 | Hs.232400 | 5.8  | <i>KIAA0701</i> | BF045873 | Hs.153293 | 2.2  |
| <i>HNRPAB</i>    | BF039814 | Hs.81361  | 3.5  | <i>KIAA0763</i> | AW461402 | Hs.244616 | 2.6  |
| <i>HNRPC</i>     | BF041354 | Hs.476302 | 2.9  | <i>KIAA0776</i> | AW462138 | Hs.149367 | 2.1  |
| <i>HNRPH1</i>    | BF041085 | Hs.202166 | 2.3  | <i>KIAA0826</i> | BF041915 | Hs.169600 | 5.3  |
| <i>HNRPH3</i>    | BF041471 | Hs.156481 | 3.3  | <i>KIAA0999</i> | BF043345 | Hs.444909 | 5.5  |
| <i>HOXB6</i>     | BF041149 | Hs.98428  | 2.3  | <i>KIAA1128</i> | BF043762 | Hs.81897  | 3.6  |
| <i>HRH1</i>      | AW464562 | Hs.1570   | 7    | <i>KIAA1268</i> | BF039426 | Hs.152925 | 4.1  |
| <i>HSD3B1</i>    | BF043416 | Hs.364941 | 9.2  | <i>KIAA1280</i> | BF042952 | Hs.12913  | 3.4  |
| <i>HSGP25L2G</i> | BF044115 | Hs.279929 | 3.6  | <i>KIAA1340</i> | AW461890 | Hs.284270 | 14.6 |
| <i>HSHPX5</i>    | AW463296 | Hs.381329 | 2.9  | <i>KIAA1387</i> | BF042682 | Hs.130900 | 3.2  |
| <i>HSPA4</i>     | BF040631 | Hs.90093  | 2.5  | <i>KIAA1404</i> | BF040808 | Hs.371794 | 2.7  |
| <i>HSPA8</i>     | AW463634 | Hs.180414 | 2.5  | <i>KIAA1458</i> | BF039339 | Hs.27263  | 2.5  |
| <i>HSPC159</i>   | AW465293 | Hs.372208 | 2.8  | <i>KIAA1698</i> | BF043085 | Hs.458390 | 3.6  |
| <i>HSPC171</i>   | BF040976 | Hs.433203 | 2.1  | <i>KIAA1772</i> | BF041402 | Hs.512745 | 2.3  |
| <i>HSPCA</i>     | BF041278 | Hs.446579 | 3.3  | <i>KIF3B</i>    | BM365093 | Hs.301206 | 7.2  |
| <i>HSPE1</i>     | BF039685 | Hs.1197   | 5.6  | <i>KLF2</i>     | BF043243 | Hs.107740 | 2.7  |
| <i>HSPG2</i>     | BF039706 | Hs.211573 | 2    | <i>KNS2</i>     | BF044185 | Hs.512578 | 3.6  |
| <i>HT014</i>     | AW463950 | Hs.31819  | 2.3  | <i>KPNA6</i>    | BF045937 | Hs.372741 | 2.2  |
| <i>HUMAGCGB</i>  | AW465540 | Hs.84162  | 2.4  | <i>LAMA4</i>    | BF041798 | Hs.437536 | 3.7  |
| <i>IDH1</i>      | AW462719 | Hs.11223  | 4    | <i>LAMB1</i>    | AW463880 | Hs.122645 | 2.5  |
| <i>IDH3B</i>     | BF039602 | Hs.436405 | 3    | <i>LAMC1</i>    | BF042606 | Hs.432855 | 7.7  |
| <i>IFRG15</i>    | BF044233 | Hs.146503 | 2.4  | <i>LAMP1</i>    | AW464747 | Hs.150101 | 2.2  |

|                  |          |           |      |                  |          |           |      |
|------------------|----------|-----------|------|------------------|----------|-----------|------|
| <i>IK</i>        | BF039948 | Hs.421245 | 2.9  | <i>LAPTM5</i>    | BF045615 | Hs.436200 | 3.1  |
| <i>IL1RN</i>     | AW464284 | Hs.81134  | 4.6  | <i>LCMR1</i>     | BF043985 | Hs.43619  | 2.1  |
| <i>IL6R</i>      | BF045216 | Hs.193400 | 8.6  | <i>LEPR</i>      | AW462416 | Hs.23581  | 2.1  |
| <i>IMP4</i>      | BF039875 | Hs.91579  | 4.7  | <i>LEPROTL1</i>  | AW466091 | Hs.146585 | 2.7  |
| <i>INADL</i>     | AW462529 | Hs.436450 | 10.6 | <i>LGMN</i>      | AW462361 | Hs.18069  | 4.4  |
| <i>IQGAP2</i>    | AW464325 | Hs.373980 | 15   | <i>LIPA</i>      | BF042287 | Hs.85226  | 3.5  |
| <i>IQGAP3</i>    | AW461931 | Hs.133294 | 2.9  | <i>LMNA</i>      | BF043552 | Hs.436441 | 4    |
| <i>ITPK1</i>     | BF041175 | Hs.408429 | 3    | <i>LOC142678</i> | AW462384 | Hs.135805 | 2.2  |
| <i>JAG2</i>      | BF043815 | Hs.433445 | 2.8  | <i>LOC161291</i> | AW461495 | Hs.146180 | 2.2  |
| <i>JARID2</i>    | AW461906 | Hs.40154  | 10   | <i>LOC169611</i> | AW465490 | Hs.357004 | 5.4  |
| <i>JTV1</i>      | BF040051 | Hs.301613 | 2.3  | <i>LOC285148</i> | BF041569 | Hs.509314 | 2.8  |
| <i>K-ALPHA-1</i> | AW463276 | Hs.446608 | 2.9  | <i>LOC374969</i> | BF042973 | Hs.113919 | 2.7  |
| <i>KIAA0089</i>  | AW464522 | Hs.82432  | 7    | <i>LOC51185</i>  | AW465256 | Hs.18925  | 2.7  |
| <i>KIAA0101</i>  | BF043904 | Hs.81892  | 4.2  | <i>LOC51315</i>  | AW463683 | Hs.5721   | 2.4  |
| <i>KIAA0182</i>  | BF046494 | Hs.222171 | 4.1  | <i>LOC90378</i>  | AW463539 | Hs.140309 | 3.4  |
| <i>KIAA0186</i>  | BF040975 | Hs.360033 | 3.4  | <i>LOC90799</i>  | AW464965 | Hs.387385 | 3.9  |
| <i>KIAA0194</i>  | AW463062 | Hs.200776 | 9.6  | <i>LOC90826</i>  | BM362608 | Hs.29645  | 2.1  |
| <i>KIAA0888</i>  | AW465315 | Hs.91662  | 2.5  | <i>LOH12CR1</i>  | BF045413 | Hs.105040 | 2    |
| <i>KIAA1026</i>  | AW462248 | Hs.368823 | 6    | <i>LOXL1</i>     | BF044606 | Hs.65436  | 2.6  |
| <i>KIAA1677</i>  | BF044906 | Hs.61603  | 2.4  | <i>LPIN1</i>     | AW463371 | Hs.81412  | 7    |
| <i>KIAA1935</i>  | BF039434 | Hs.438789 | 12.4 | <i>LRDD</i>      | BF042206 | Hs.438986 | 6.3  |
| <i>KIF4A</i>     | BM362620 | Hs.279766 | 22.4 | <i>LRRFIP1</i>   | AW464400 | Hs.512387 | 5    |
| <i>KIF5C</i>     | BF044366 | Hs.6641   | 2.1  | <i>LSR7</i>      | AW463046 | Hs.283709 | 6.3  |
| <i>KLHDC3</i>    | AW465497 | Hs.412468 | 2.9  | <i>LY96</i>      | BM366661 | Hs.69328  | 16.2 |
| <i>KPNA2</i>     | BF040179 | Hs.252712 | 3.3  | <i>MAFB</i>      | AW461546 | Hs.169487 | 10.8 |
| <i>KRT18</i>     | BF045923 | Hs.406013 | 117  | <i>MAGED1</i>    | AW465622 | Hs.5258   | 3.2  |
| <i>KRT19</i>     | AW463298 | Hs.309517 | 5.4  | <i>MAGED2</i>    | BF046279 | Hs.376719 | 7.3  |
| <i>LAP3</i>      | AW464690 | Hs.182579 | 3.1  | <i>MAGED4</i>    | BM364493 | Hs.376347 | 2.9  |
| <i>LAPTM4A</i>   | BF044310 | Hs.111894 | 3.6  | <i>MAN1A2</i>    | AW462764 | Hs.367638 | 4.9  |
| <i>LASP1</i>     | BM365210 | Hs.334851 | 4.1  | <i>MAN1C1</i>    | BF041990 | Hs.8910   | 12.4 |
| <i>LEMD2</i>     | BF045537 | Hs.444845 | 13   | <i>MAP1B</i>     | BF046265 | Hs.103042 | 4.2  |
| <i>LILRB3</i>    | BF044309 | Hs.511766 | 9.8  | <i>MAPK9</i>     | AW462791 | Hs.348446 | 8.3  |
| <i>LMAN2</i>     | AW463843 | Hs.75864  | 4.8  | <i>MARCKS</i>    | AW464527 | Hs.318603 | 6.2  |
| <i>LOC124491</i> | BF043264 | Hs.487510 | 4.1  | <i>MASA</i>      | BF043107 | Hs.18442  | 3    |
| <i>LOC129642</i> | AW462807 | Hs.90797  | 2.6  | <i>MAST3</i>     | BF045464 | Hs.173864 | 2.6  |
| <i>LOC142678</i> | AW462619 | Hs.135805 | 2    | <i>MBNL1</i>     | AW465357 | Hs.28578  | 21.5 |
| <i>LOC150678</i> | BF046082 | Hs.293884 | 2.3  | <i>MBNL2</i>     | BF045778 | Hs.372571 | 9.6  |
| <i>LOC199692</i> | BF043047 | Hs.14831  | 4    | <i>ME1</i>       | BF041340 | Hs.14732  | 25.8 |
| <i>LOC254531</i> | BF045562 | Hs.352614 | 4.9  | <i>ME2</i>       | BF043576 | Hs.75342  | 2.4  |
| <i>LOC284379</i> | BF041114 | Hs.405866 | 12.7 | <i>MEF2B</i>     | AW462879 | Hs.78881  | 2.2  |
| <i>LOC374395</i> | BM366123 | Hs.381134 | 2.1  | <i>MEF2D</i>     | BF041552 | Hs.77955  | 3    |
| <i>LOC55971</i>  | BF045001 | Hs.23449  | 16.2 | <i>MEIS2</i>     | BF040423 | Hs.362805 | 9.3  |
| <i>LOC81691</i>  | BF045879 | Hs.177926 | 3.1  | <i>MESDC2</i>    | BF046291 | Hs.78871  | 2.5  |
| <i>LOC91661</i>  | BM366348 | Hs.190394 | 2.8  | <i>MEST</i>      | AW466002 | Hs.440459 | 3.5  |
| <i>LRBA</i>      | AW465529 | Hs.209846 | 3.2  | <i>MFGE8</i>     | BF039309 | Hs.3745   | 2.3  |
| <i>LRP2</i>      | AW464520 | Hs.252938 | 22.8 | <i>MFHAS1</i>    | BF042291 | Hs.379414 | 9.3  |
| <i>LSM4</i>      | BM364879 | Hs.76719  | 2.5  | <i>MFN2</i>      | AW463654 | Hs.376681 | 2.8  |
| <i>LSM6</i>      | BF046429 | Hs.149675 | 2.3  | <i>MGC15407</i>  | BF044362 | Hs.23128  | 2.9  |
| <i>LUC7L</i>     | BF046369 | Hs.16803  | 3.4  | <i>MGC15429</i>  | BF040412 | Hs.236025 | 2.1  |
| <i>LZIC</i>      | BF044520 | Hs.327252 | 3.2  | <i>MGC15482</i>  | BF045611 | Hs.194498 | 3.1  |
| <i>M6PRBP1</i>   | BM365495 | Hs.140452 | 3.6  | <i>MGC16063</i>  | BM366713 | Hs.410491 | 2.2  |
| <i>MAD2L1</i>    | BF039606 | Hs.79078  | 28.7 | <i>MGC18216</i>  | BF042921 | Hs.104679 | 6    |

|          |          |           |      |          |          |           |      |
|----------|----------|-----------|------|----------|----------|-----------|------|
| MAGI-3   | BF039256 | Hs.446369 | 2.1  | MGC2714  | AW464730 | Hs.74284  | 3    |
| MANBA    | AW466031 | Bt.1798   | 3    | MGC2747  | AW464523 | Hs.356467 | 2.5  |
| MAP3K3   | AW461340 | Hs.29282  | 3.5  | MGC29729 | BF040777 | Hs.13580  | 2.5  |
| MAPK1    | BF040969 | Hs.324473 | 3    | MGC32065 | BM366294 | Hs.8705   | 3.7  |
| MAPRE1   | BF039019 | Hs.408754 | 5.3  | MITF     | BF040850 | Hs.166017 | 12.9 |
| MAX      | BF042337 | Hs.42712  | 4.5  | MMD      | BF040536 | Hs.79889  | 2.5  |
| MCFD2    | BF039691 | Hs.293689 | 2.1  | MMP2     | BF039163 | Hs.367877 | 18.1 |
| MCM4     | BF045235 | Hs.460184 | 9.8  | MNAB     | AW464250 | Hs.112227 | 3.1  |
| MCM7     | AW463357 | Hs.438720 | 4.7  | MPG      | AW465892 | Hs.79396  | 2.4  |
| MDH1     | BF043729 | Hs.75375  | 2.6  | M-RIP    | AW462100 | Hs.430725 | 3.3  |
| MDH2     | BM366522 | Hs.405860 | 2.2  | MRPL28   | AW462261 | Hs.279869 | 2.8  |
| MEA      | BF042342 | Hs.278362 | 2.3  | MRPS18A  | BF044767 | Hs.9622   | 2.9  |
| MGC10120 | BF039617 | Hs.34906  | 3.3  | MRPS25   | BF040761 | Hs.458338 | 2.2  |
| MGC10540 | AW462805 | Hs.500165 | 2.2  | MUF1     | AW464143 | Hs.144941 | 2.3  |
| MGC10871 | AW464526 | Hs.49994  | 2.2  | MYLIP    | BF045523 | Hs.443793 | 3.6  |
| MGC16028 | BF042405 | Hs.446344 | 2.2  | MYLK     | AW465934 | Hs.386078 | 3.8  |
| MGC16384 | BF040661 | Hs.274268 | 2.9  | NAB2     | BF042964 | Hs.159223 | 2.5  |
| MGC20533 | BF039493 | Hs.69280  | 2.4  | NBL1     | BF039753 | Hs.439671 | 13.8 |
| MGC2594  | BF040009 | Hs.181551 | 3.2  | NDUFB2   | BF045201 | Hs.27262  | 3.8  |
| MGC2650  | BF042119 | Hs.386422 | 2.7  | NEDD5    | AW464770 | Hs.131736 | 2.1  |
| MGC4189  | BF041209 | Hs.355584 | 2.8  | NEURL    | BF041657 | Hs.146233 | 4.5  |
| MGC4248  | BF039717 | Hs.495628 | 3.8  | NFAT5    | BF043095 | Hs.86998  | 3.9  |
| MGC42530 | BF039645 | Hs.21902  | 4.8  | NFX1     | BF041309 | Hs.413074 | 4.5  |
| MGC45780 | AW462882 | Hs.146246 | 4.8  | NICAL    | BM364733 | Hs.33476  | 2.6  |
| MGC4796  | BF044278 | Hs.439658 | 2.1  | NIFU     | AW463668 | Hs.350702 | 2.1  |
| MGST2    | AW463844 | Hs.81874  | 3.4  | NNT      | BM364482 | Hs.106620 | 10.8 |
| MIF      | AW463009 | Hs.407995 | 4    | NQO1     | AW463057 | Hs.406515 | 2.8  |
| MJD      | BF041320 | Hs.419756 | 2.2  | NT5E     | AW465608 | Hs.153952 | 20.3 |
| MKI67IP  | BF042064 | Hs.367842 | 4.9  | NTANI    | AW465041 | Hs.351573 | 3.5  |
| MKRNI    | BF043630 | Hs.7838   | 5.1  | OAS1     | AW463521 | Hs.442936 | 2.2  |
| MLP      | AW464012 | Hs.75061  | 11.6 | ODAG     | AW463627 | Hs.21145  | 3.3  |
| MOV10    | BF044383 | Hs.512586 | 6.2  | OSBP2    | BF043536 | Hs.7740   | 2.4  |
| MRPL11   | AW466183 | Hs.418450 | 2.8  | P24B     | BF041582 | Hs.424551 | 2.1  |
| MRPL27   | AW464763 | Hs.7736   | 2.2  | p66alpha | AW462802 | Hs.118964 | 4.6  |
| MRPL32   | AW464800 | Hs.50252  | 3.1  | p97      | BF044993 | Bt.989    | 2.1  |
| MRPL45   | AW464062 | Hs.19347  | 2.2  | PAK2     | AW465924 | Hs.284275 | 3.4  |
| MRPL48   | BF039118 | Hs.82389  | 11.5 | PAK6     | AW461984 | Hs.21420  | 3.4  |
| MRPL50   | AW465872 | Hs.288224 | 2.6  | PAM      | BF039358 | Hs.151411 | 2.2  |
| MRPL51   | BF046475 | Hs.55847  | 4.9  | PARD3    | BF039164 | Hs.72249  | 2.9  |
| MRPL55   | BF044634 | Hs.63236  | 3.1  | PARG1    | BF043143 | Hs.430919 | 9.8  |
| MRPS17   | BF041972 | Hs.44298  | 2.2  | PDGFC    | BF045152 | Hs.43080  | 31.4 |
| MRS2L    | BF043713 | Hs.146030 | 3.3  | PDGFRA   | BM362352 | Hs.74615  | 3.2  |
| MSH2     | AW462937 | Hs.440394 | 2.8  | PEA15    | AW462240 | Hs.194673 | 5.3  |
| MTA3     | AW463092 | Hs.435413 | 4.5  | PEG3     | AW464326 | Hs.201776 | 3.1  |
| MTHFD1   | BF043996 | Hs.435974 | 2.2  | PEL1I    | BF042148 | Hs.7886   | 2.4  |
| MTHFD2   | BF046156 | Hs.154672 | 2.2  | PEPD     | BF041804 | Hs.444207 | 13.5 |
| MYH7B    | AW462131 | Hs.414122 | 2.7  | PER2     | AW464080 | Hs.410692 | 4.4  |
| MYO1B    | AW461464 | Hs.121576 | 2.1  | PES1     | BF040094 | Hs.132037 | 2.4  |
| MYO5B    | BF041379 | Hs.512590 | 3    | PGR1     | BF041607 | Hs.406590 | 2    |
| na       | BF041656 | Hs.449674 | 7.1  | PHC2     | BF044452 | Hs.165263 | 2.7  |
| na       | BF042838 | Hs.220594 | 2.9  | PHLDB1   | BF042420 | Hs.149653 | 2.6  |
| na       | BF044446 | Mm.300203 | 2.4  | PHYH     | BF040744 | Hs.172887 | 3.7  |



|                   |          |           |      |                |          |           |      |
|-------------------|----------|-----------|------|----------------|----------|-----------|------|
| <i>NANS</i>       | BF042832 | Hs.274424 | 3.2  | <i>PIGF</i>    | AW463364 | Hs.426142 | 2.1  |
| <i>NAPI</i>       | AW461455 | Hs.9196   | 2.4  | <i>PJAI</i>    | AW462864 | Hs.21122  | 3.1  |
| <i>NAP1L4</i>     | AW461738 | Hs.269403 | 3.5  | <i>PLAGL1</i>  | BF042359 | Hs.132911 | 19.6 |
| <i>NASP</i>       | BF039280 | Hs.446206 | 12.1 | <i>PLAGL2</i>  | BF045934 | Hs.154104 | 2.2  |
| <i>NCL</i>        | BM365702 | Hs.79110  | 3.4  | <i>PLDN</i>    | BF040968 | Hs.7037   | 2.3  |
| <i>NCOR2</i>      | AW464487 | Hs.287994 | 2.7  | <i>PLEKHA4</i> | BF040208 | Hs.9469   | 2.6  |
| <i>NDEL1</i>      | AW464113 | Hs.3850   | 3.4  | <i>PLK2</i>    | BF046202 | Hs.398157 | 3    |
| <i>NDFIP2</i>     | BF040024 | Hs.30340  | 4.4  | <i>PLOD2</i>   | AW461559 | Hs.41270  | 3    |
| <i>NDNL2</i>      | BF042265 | Hs.512642 | 2.5  | <i>PLOD3</i>   | BF039911 | Hs.153357 | 2.1  |
| <i>NDST1</i>      | AW463146 | Hs.20894  | 2.7  | <i>PLP2</i>    | BF039237 | Hs.77422  | 2.4  |
| <i>NDUFA2</i>     | BM362349 | Hs.163867 | 2    | <i>PLS3</i>    | AW462747 | Hs.430166 | 28.6 |
| <i>NDUFA4</i>     | AW462289 | Hs.50098  | 2.2  | <i>PP1201</i>  | AW463678 | Hs.434007 | 3.7  |
| <i>NDUFA7</i>     | BF039167 | Hs.19561  | 2.2  | <i>PP2135</i>  | BM365371 | Hs.132569 | 2.5  |
| <i>NDUFB9</i>     | BF042526 | Hs.15977  | 2.4  | <i>PPIC</i>    | AW464749 | Hs.110364 | 17.6 |
| <i>NDUFS2</i>     | AW465817 | Hs.173611 | 2.4  | <i>PPP1R3C</i> | BF039138 | Hs.303090 | 2.1  |
| <i>NDUFV1</i>     | AW461976 | Hs.7744   | 2.9  | <i>PPP2R5C</i> | AW464337 | Hs.249955 | 2.9  |
| <i>NDUFV3</i>     | BF043651 | Hs.199471 | 2.5  | <i>PPP3CB</i>  | BF046424 | Hs.187543 | 4.1  |
| <i>NET1</i>       | AW461566 | Hs.25155  | 4    | <i>PPP5C</i>   | AW465043 | Hs.431861 | 2.2  |
| <i>NIP30</i>      | BM365995 | Hs.285017 | 7.6  | <i>PRDX4</i>   | AW464389 | Hs.83383  | 2.2  |
| <i>NME1</i>       | BF046426 | Hs.118638 | 2.4  | <i>PREP</i>    | AW462014 | Hs.433986 | 2.1  |
| <i>NME2</i>       | BF039702 | Hs.433416 | 2.7  | <i>PRKAG2</i>  | AW464038 | Hs.259842 | 9.5  |
| <i>NOL5A</i>      | BM365616 | Hs.376064 | 2.6  | <i>PSME1</i>   | AW465589 | Hs.75348  | 2.4  |
| <i>NOL7</i>       | AW463895 | Hs.106346 | 3    | <i>PTOVI</i>   | BF042680 | Hs.227429 | 12.8 |
| <i>NOLAI</i>      | AW463985 | Hs.69851  | 6    | <i>PTP4A2</i>  | AW462951 | Hs.82911  | 2.8  |
| <i>NOP5/NOP58</i> | BF044828 | Hs.119908 | 3.3  | <i>PTPLA</i>   | BF046141 | Hs.114062 | 6.6  |
| <i>NR2F2</i>      | BF040489 | Hs.347991 | 3.7  | <i>PTPLB</i>   | AW463633 | Hs.5957   | 3.7  |
| <i>NRAS</i>       | BF043255 | Hs.260523 | 5.7  | <i>PTPNS1</i>  | BF044338 | Hs.156114 | 11.6 |
| <i>NSFL1C</i>     | AW465907 | Hs.12865  | 2.8  | <i>PTRF</i>    | BF046361 | Hs.437191 | 4    |
| <i>NUDC</i>       | BM365709 | Hs.263812 | 6    | <i>PUM2</i>    | BF045599 | Hs.133543 | 2.7  |
| <i>NUP107</i>     | BF044757 | Hs.355598 | 2.1  | <i>PVR</i>     | BF043635 | Hs.171844 | 2.9  |
| <i>NUPL1</i>      | AW464892 | Hs.406243 | 5    | <i>PXK</i>     | BF045939 | Hs.77646  | 3.4  |
| <i>OAT</i>        | AW461524 | Hs.75485  | 2.2  | <i>PYGL</i>    | BF042168 | Hs.282417 | 2.3  |
| <i>ODC1</i>       | BF043697 | Hs.443409 | 20.1 | <i>Qk</i>      | AW465698 | Mm.262294 | 2.2  |
| <i>ORF1-FL49</i>  | AW462485 | Hs.323512 | 2    | <i>QKI</i>     | AW461364 | Hs.153355 | 2.4  |
| <i>OSBP</i>       | BF045060 | Hs.24734  | 2.2  | <i>QSCN6</i>   | AW464672 | Hs.77266  | 18.6 |
| <i>P5</i>         | AW463980 | Hs.212102 | 2.2  | <i>RAB10</i>   | AW466033 | Hs.236494 | 5.9  |
| <i>PAI-RBP1</i>   | BM366101 | Hs.356427 | 2.1  | <i>RAB13</i>   | AW465441 | Hs.525461 | 6.2  |
| <i>PAN3</i>       | AW464194 | Hs.190153 | 3    | <i>RAB22A</i>  | AW465612 | Hs.281117 | 2.4  |
| <i>PAPOLA</i>     | AW465624 | Hs.201085 | 2.4  | <i>RAB2L</i>   | BM363900 | Hs.170160 | 3.8  |
| <i>PARK7</i>      | BF042174 | Hs.419640 | 3    | <i>RAB31</i>   | AW464597 | Hs.223025 | 17.8 |
| <i>PCNA</i>       | BF046377 | Hs.78996  | 3    | <i>RAB32</i>   | AW463501 | Hs.32217  | 6.1  |
| <i>PDCD8</i>      | BF042165 | Hs.18720  | 3.3  | <i>RAB9A</i>   | AW465952 | Hs.444327 | 2.3  |
| <i>PDHA1</i>      | BF045636 | Hs.1023   | 2.1  | <i>RABEP1</i>  | BF046234 | Hs.390163 | 3.7  |
| <i>PDHB</i>       | BM362383 | Hs.161357 | 4.9  | <i>RABGEF1</i> | BF042759 | Hs.187660 | 2.8  |
| <i>PDLIM1</i>     | BF045376 | Hs.75807  | 3.7  | <i>RABL2A</i>  | BM364540 | Hs.446425 | 2.7  |
| <i>PDLIM7</i>     | BF044886 | Hs.436339 | 3.8  | <i>RANBP9</i>  | BF045153 | Hs.306242 | 2.2  |
| <i>PECAM1</i>     | AW462978 | Hs.78146  | 3.5  | <i>RAP2C</i>   | AW462076 | Hs.225979 | 8.7  |
| <i>Peci</i>       | BF039332 | Mm.28883  | 2.5  | <i>RBM3</i>    | BF044746 | Hs.301404 | 5.7  |
| <i>Pepf</i>       | AW462838 | Mm.34037  | 4.5  | <i>RBM9</i>    | BF040578 | Hs.433574 | 4.6  |
| <i>PFDN2</i>      | AW465585 | Hs.298229 | 2.3  | <i>RBMS1</i>   | AW461487 | Hs.241567 | 6.2  |
| <i>PGA5</i>       | AW465124 | Hs.432854 | 12.4 | <i>RCOR</i>    | AW465701 | Hs.405373 | 3.5  |
| <i>PGAM1</i>      | AW462044 | Hs.447492 | 2.3  | <i>RCP9</i>    | AW464141 | Hs.300684 | 2.1  |

|                  |          |           |      |                 |          |           |      |
|------------------|----------|-----------|------|-----------------|----------|-----------|------|
| <i>PGS1</i>      | AW465578 | Hs.162604 | 2    | <i>RELA</i>     | BM364681 | Hs.132594 | 3.4  |
| <i>PHB</i>       | AW463359 | Hs.75323  | 5.9  | <i>RERE</i>     | AW463197 | Hs.194369 | 4.2  |
| <i>PIP5K2A</i>   | BF044627 | Hs.108966 | 5    | <i>RFWD1</i>    | AW462150 | Hs.323230 | 2.6  |
| <i>PITPNM1</i>   | BM365100 | Hs.93837  | 2.2  | <i>RGNEF</i>    | BM363894 | Hs.33254  | 4.3  |
| <i>PLAA</i>      | BF040868 | Hs.27182  | 2.3  | <i>RGS20</i>    | AW462880 | Hs.141492 | 7.4  |
| <i>PLS1</i>      | AW461461 | Hs.203637 | 5.6  | <i>RICH1</i>    | AW463851 | Hs.203605 | 2.2  |
| <i>PME-1</i>     | BF041432 | Hs.63304  | 3    | <i>RIG</i>      | AW462599 | Hs.278503 | 11.5 |
| <i>PNPT1</i>     | AW465370 | Hs.392004 | 3    | <i>Rnaset2</i>  | BF039573 | Mm.181237 | 4    |
| <i>POGZ</i>      | BF042111 | Hs.107088 | 4    | <i>RNF12</i>    | BF045377 | Hs.122121 | 3    |
| <i>POLS</i>      | BF041190 | Hs.39488  | 2.7  | <i>RNF149</i>   | BF044572 | Hs.171802 | 2.1  |
| <i>POP5</i>      | BF045323 | Hs.279913 | 2.3  | <i>RNH</i>      | AW465255 | Hs.130958 | 6.3  |
| <i>PPARBP</i>    | BF045606 | Hs.15589  | 2    | <i>RPL19</i>    | AW463099 | Hs.381061 | 2.1  |
| <i>PPID</i>      | AW463884 | Hs.143482 | 2    | <i>RPL32</i>    | AW461478 | Hs.265174 | 2.1  |
| <i>PPIL1</i>     | AW463422 | Hs.27693  | 2.4  | <i>RPS18</i>    | AW461520 | Hs.275865 | 2.1  |
| <i>PPP1CA</i>    | AW461451 | Hs.183994 | 2.2  | <i>RPS24</i>    | AW462612 | Hs.356794 | 2    |
| <i>PPP1R13B</i>  | BF040615 | Hs.371546 | 2    | <i>RPS9</i>     | AW463130 | Hs.139876 | 22.9 |
| <i>PPT2</i>      | BF040321 | Hs.332138 | 2.3  | <i>RRAGD</i>    | BF046710 | Hs.238679 | 5.4  |
| <i>PRDX1</i>     | BF046014 | Hs.180909 | 4.1  | <i>RRBP1</i>    | BF045657 | Hs.98614  | 3    |
| <i>PRDX2</i>     | AW463516 | Hs.432121 | 2.6  | <i>RSU1</i>     | BF043332 | Hs.477460 | 2.2  |
| <i>PRELP</i>     | AW463358 | Hs.76494  | 2    | <i>RTN3</i>     | BF045332 | Hs.404434 | 9.4  |
| <i>PRKCI</i>     | BF039363 | Hs.496511 | 3.4  | <i>RTN4</i>     | AW465802 | Hs.436349 | 6.4  |
| <i>PRKWNK1</i>   | AW464654 | Hs.275999 | 2.7  | <i>S100A11</i>  | AW465337 | Hs.417004 | 5.3  |
| <i>PRL</i>       | AW463978 | Hs.1905   | 2.2  | <i>S100A6</i>   | AW462018 | Hs.275243 | 2.2  |
| <i>ProSAPiP1</i> | BF045801 | Hs.90232  | 3    | <i>SALL4</i>    | BF040616 | Hs.189095 | 2.3  |
| <i>PRPS1</i>     | AW463778 | Hs.56     | 2.7  | <i>SARA1</i>    | AW461369 | Hs.110796 | 2.4  |
| <i>PS1D</i>      | BF045707 | Hs.54971  | 3.1  | <i>SCA1</i>     | BF044458 | Hs.434961 | 47.6 |
| <i>PSMA2</i>     | AW465113 | Hs.333786 | 2.6  | <i>SCD</i>      | BF044532 | Hs.119597 | 7.1  |
| <i>PSMB5</i>     | AW465471 | Hs.422990 | 2.4  | <i>Scnn1g</i>   | BF046512 | Mm.35247  | 2.9  |
| <i>PSMC6</i>     | BF043455 | Hs.156171 | 2.2  | <i>SDC1</i>     | AW461914 | Hs.82109  | 2.6  |
| <i>PTBP1</i>     | BF042297 | Hs.172550 | 2.2  | <i>SDC2</i>     | BF040962 | Hs.1501   | 5.4  |
| <i>PTGS2</i>     | AW462092 | Hs.196384 | 31.6 | <i>SDCBP</i>    | AW463000 | Hs.164067 | 2.9  |
| <i>PTP4A2</i>    | AW462825 | Hs.82911  | 2    | <i>SDCCAG16</i> | BM364585 | Hs.271926 | 2.6  |
| <i>PTPN11</i>    | AW463332 | Hs.83572  | 2.1  | <i>SEC24B</i>   | BF041917 | Hs.7239   | 2.6  |
| <i>PUS1</i>      | BF044673 | Hs.23723  | 2.8  | <i>SEC31L1</i>  | AW465976 | Hs.436549 | 2.1  |
| <i>QP-C</i>      | BF039168 | Hs.146602 | 2.7  | <i>SENP5</i>    | BF045812 | Hs.13138  | 2.6  |
| <i>RAB11A</i>    | AW463899 | Hs.75618  | 2.4  | <i>SERPINE1</i> | BF044893 | Hs.414795 | 13   |
| <i>RAB15</i>     | BF046652 | Hs.512492 | 7.1  | <i>SERTAD4</i>  | AW464004 | Hs.445835 | 4.7  |
| <i>RAB25</i>     | BF044476 | Hs.150826 | 3.3  | <i>SGCE</i>     | AW465090 | Hs.409798 | 10.6 |
| <i>RABGGTB</i>   | BF043458 | Hs.78948  | 2.1  | <i>SH3BGR</i>   | BF044995 | Hs.47438  | 7.7  |
| <i>RAD23B</i>    | BF043457 | Hs.159087 | 2.5  | <i>SH3BGRL</i>  | BF046438 | Hs.14368  | 4.4  |
| <i>RALA</i>      | BF041191 | Hs.6906   | 3.7  | <i>SHC1</i>     | BF044671 | Hs.433795 | 2.1  |
| <i>RALGDS</i>    | BF046679 | Hs.106185 | 3.1  | <i>SIAH2</i>    | AW462510 | Hs.20191  | 3.8  |
| <i>RAN</i>       | BF043183 | Hs.10842  | 2.3  | <i>SIK2</i>     | AW463026 | Hs.306864 | 4.8  |
| <i>RANBP1</i>    | AW462220 | Hs.24763  | 3.2  | <i>SLC2A12</i>  | BF042555 | Hs.26691  | 2.6  |
| <i>RANBP3</i>    | BF039596 | Hs.176657 | 31.6 | <i>SLC31A2</i>  | AW465186 | Hs.24030  | 2.8  |
| <i>RBMX</i>      | BM366177 | Hs.380118 | 4.7  | <i>SLC35F5</i>  | AW464767 | Hs.437608 | 2.7  |
| <i>RBPMS</i>     | AW465800 | Hs.195825 | 2.6  | <i>SLC36A2</i>  | BF039414 | Hs.369698 | 2.5  |
| <i>RBX1</i>      | AW461667 | Hs.373992 | 3.2  | <i>SLC4A9</i>   | BF041732 | Hs.436282 | 2.5  |
| <i>Rdh11</i>     | BF039125 | Mm.291799 | 2.4  | <i>SMARCA1</i>  | AW462589 | Hs.152292 | 2.4  |
| <i>RDH8</i>      | BF044254 | Bt.266    | 4    | <i>SMARCD3</i>  | BM362351 | Hs.444445 | 2.3  |
| <i>REST</i>      | BF042657 | Hs.401145 | 3.9  | <i>SMOC1</i>    | AW464482 | Hs.14144  | 5.1  |
| <i>RFC2</i>      | AW464812 | Hs.139226 | 2.4  | <i>SPAG1</i>    | BF041310 | Hs.408747 | 4.7  |

|                 |          |           |      |                |          |           |      |
|-----------------|----------|-----------|------|----------------|----------|-----------|------|
| <i>RHPN2</i>    | BF042073 | Hs.335798 | 26.2 | <i>SPARC</i>   | BF039331 | Hs.111779 | 11.7 |
| <i>RNASEH2A</i> | BF044821 | Hs.25292  | 7.9  | <i>SPATA7</i>  | BF040172 | Hs.414464 | 2.7  |
| <i>RNPEPL1</i>  | AW461630 | Hs.5345   | 8.1  | <i>SPP1</i>    | BF042926 | Hs.313    | 16.4 |
| <i>RNU15A</i>   | AW461960 | Hs.387576 | 2.3  | <i>SPTAN1</i>  | BF040453 | Hs.387905 | 2.4  |
| <i>RNUT1</i>    | BM365040 | Hs.21577  | 3    | <i>SPTBN1</i>  | BF042525 | Hs.205401 | 24   |
| <i>RPA3</i>     | AW461938 | Hs.1608   | 2.9  | <i>SPUVE</i>   | BF046620 | Hs.25338  | 3.4  |
| <i>RPF1</i>     | BF045539 | Hs.287863 | 2    | <i>SRGAP1</i>  | BF040565 | Hs.408259 | 2.3  |
| <i>RPIA</i>     | AW463187 | Hs.79886  | 2.6  | <i>SRP68</i>   | BF044981 | Hs.273307 | 4    |
| <i>RPL4</i>     | BM364045 | Hs.186350 | 4.4  | <i>SRPR</i>    | AW462756 | Hs.444058 | 4.6  |
| <i>RPL7L1</i>   | AW463727 | Hs.446506 | 3.6  | <i>SSBP2</i>   | AW461545 | Hs.152207 | 2.6  |
| <i>RPS6KA1</i>  | BM365203 | Hs.149957 | 2.6  | <i>SSH2</i>    | BF046189 | Hs.25127  | 2.1  |
| <i>RPS6KA5</i>  | BF045195 | Hs.109058 | 2.7  | <i>STAM</i>    | BF040813 | Hs.441498 | 2.1  |
| <i>RRAD</i>     | AW462180 | Hs.1027   | 2.3  | <i>STARD13</i> | BM366176 | Hs.369912 | 3    |
| <i>RRAGD</i>    | AW463045 | Hs.238679 | 2.1  | <i>STAT1</i>   | BF043726 | Hs.21486  | 4    |
| <i>RRP40</i>    | BF039801 | Hs.177677 | 3    | <i>STC1</i>    | BF043835 | Hs.25590  | 3.5  |
| <i>S100A14</i>  | AW463587 | Hs.288998 | 5.4  | <i>STK17A</i>  | AW461403 | Hs.9075   | 2.4  |
| <i>S100A2</i>   | AW465235 | Hs.515713 | 2.2  | <i>STX6</i>    | AW465249 | Hs.157144 | 4.7  |
| <i>SAP18</i>    | BF042896 | Hs.23964  | 3    | <i>SUI1</i>    | BM366260 | Hs.150580 | 2.6  |
| <i>SART3</i>    | BM366785 | Hs.408238 | 2.5  | <i>SYAP1</i>   | BF044239 | Hs.489336 | 2.5  |
| <i>SCN1A</i>    | AW463734 | Hs.446415 | 3.5  | <i>SYNCRIP</i> | BF043017 | Hs.436376 | 2.9  |
| <i>SCP2</i>     | BF042542 | Hs.75760  | 2.4  | <i>T1</i>      | AW462101 | Hs.416372 | 4.6  |
| <i>SDHD</i>     | AW464036 | Hs.356270 | 2.5  | <i>TACCI</i>   | BF042210 | Hs.279245 | 3.1  |
| <i>SE57-1</i>   | AW463203 | Hs.30315  | 9.6  | <i>TAGLN</i>   | AW461650 | Hs.410977 | 2.3  |
| <i>SEC14L1</i>  | BF043252 | Hs.75232  | 2.4  | <i>TBC1D14</i> | BF045400 | Hs.72242  | 3.5  |
| <i>SERPING1</i> | AW461469 | Hs.384598 | 2    | <i>TBC1D8</i>  | BF043720 | Hs.442657 | 3.2  |
| <i>SET</i>      | BF045176 | Hs.436687 | 2.4  | <i>TCF12</i>   | BF043908 | Hs.438166 | 4    |
| <i>SF3B3</i>    | AW461949 | Hs.195614 | 2.1  | <i>TCF7L1</i>  | AW461964 | Hs.318517 | 2.9  |
| <i>SFRS1</i>    | AW463237 | Hs.68714  | 3.8  | <i>TCIRG1</i>  | BF039561 | Hs.46465  | 2.2  |
| <i>SFRS2</i>    | AW465002 | Hs.73965  | 3.1  | <i>TDE1</i>    | AW461644 | Hs.272168 | 2.8  |
| <i>SFRS2IP</i>  | BF041422 | Hs.210367 | 4.2  | <i>TFAP2A</i>  | BF039106 | Hs.210911 | 5.7  |
| <i>SFRS3</i>    | BF045497 | Hs.405144 | 3.5  | <i>TGFBR2</i>  | AW462227 | Hs.82028  | 20.7 |
| <i>SFRS6</i>    | BF044816 | Hs.6891   | 2    | <i>THBS1</i>   | AW461636 | Hs.164226 | 2.5  |
| <i>SFRS7</i>    | BF045069 | Hs.309090 | 5.6  | <i>TIGA1</i>   | AW462064 | Hs.12082  | 2.4  |
| <i>SGK</i>      | AW463448 | Hs.296323 | 2.2  | <i>TIGD2</i>   | BF040734 | Hs.58924  | 3.6  |
| <i>SGKL</i>     | BF044261 | Hs.380877 | 2.3  | <i>TIMP3</i>   | AW466116 | Hs.245188 | 26.9 |
| <i>SGPL1</i>    | BF045752 | Hs.186613 | 2.9  | <i>TLE4</i>    | AW462813 | Hs.494269 | 2.5  |
| <i>SH120</i>    | BF044826 | Hs.504478 | 2.8  | <i>TLN2</i>    | BF041839 | Hs.137129 | 5.2  |
| <i>ShrmL</i>    | BF042387 | Hs.408902 | 6.7  | <i>TLP19</i>   | BF046280 | Hs.241489 | 3.5  |
| <i>SIGIRR</i>   | AW461759 | Hs.433036 | 2.1  | <i>TM4SF13</i> | AW463886 | Hs.364544 | 2.1  |
| <i>SKB1</i>     | AW465024 | Hs.367854 | 2.9  | <i>TM4SF8</i>  | AW465786 | Hs.259212 | 3    |
| <i>SLC11A2</i>  | AW464300 | Hs.57435  | 2.6  | <i>TMSB4X</i>  | AW463860 | Hs.75968  | 4.6  |
| <i>SLC16A13</i> | AW464274 | Hs.448010 | 2.5  | <i>TNC</i>     | BF039202 | Hs.98998  | 15.2 |
| <i>SLC1A3</i>   | BF042208 | Hs.371369 | 7.7  | <i>TNFAIP6</i> | AW461501 | Hs.407546 | 6.9  |
| <i>SLC25A5</i>  | AW463693 | Hs.79172  | 11.1 | <i>TNPO3</i>   | BM362010 | Hs.412527 | 2.3  |
| <i>SLC2A1</i>   | AW463536 | Hs.169902 | 13   | <i>TNS</i>     | AW465869 | Bt.5309   | 2.6  |
| <i>SLC2A14</i>  | AW463170 | Hs.401274 | 12   | <i>TNS</i>     | BF039116 | Hs.439442 | 2.4  |
| <i>SLC2A3</i>   | AW464247 | Hs.419240 | 5.2  | <i>TPM1</i>    | BF045342 | Hs.133892 | 9.5  |
| <i>SLC39A8</i>  | BF045137 | Hs.284205 | 12.9 | <i>TRPC1</i>   | BF046685 | Hs.250687 | 9.9  |
| <i>SLC4A5</i>   | BF041453 | Hs.321127 | 4.3  | <i>TSC22</i>   | BF043277 | Hs.114360 | 2.7  |
| <i>SLC5A6</i>   | BM363878 | Hs.435735 | 7.7  | <i>TXNDC4</i>  | BF046205 | Hs.154023 | 2.6  |
| <i>SLC7A7</i>   | AW463705 | Hs.194693 | 3.7  | <i>TXNDC5</i>  | BF043118 | Hs.430169 | 2.3  |
| <i>SLC7A8</i>   | AW464251 | Hs.22891  | 16.5 | <i>TXNIP</i>   | AW463867 | Hs.179526 | 4.2  |

|                |          |           |      |                  |          |           |      |
|----------------|----------|-----------|------|------------------|----------|-----------|------|
| <i>SLCO2B1</i> | AW464903 | Hs.7884   | 6.9  | <i>UISNRNPBP</i> | BM364850 | Hs.427552 | 8    |
| <i>SMAP</i>    | AW465313 | Hs.447513 | 3.8  | <i>UBAPI</i>     | BF045394 | Hs.436169 | 2.4  |
| <i>SNAP23</i>  | AW462506 | Hs.202308 | 2.3  | <i>UBE2B</i>     | BF043589 | Hs.385986 | 4.8  |
| <i>SND1</i>    | AW462967 | Hs.511400 | 3.3  | <i>UBE2D2</i>    | AW463707 | Hs.108332 | 2.2  |
| <i>SNRPB2</i>  | AW462538 | Hs.280378 | 2    | <i>UBE2H</i>     | BF043624 | Hs.372758 | 2.7  |
| <i>SNRPD3</i>  | AW464074 | Hs.356549 | 3.7  | <i>UBE2V1</i>    | BF046628 | Hs.381025 | 12.4 |
| <i>SNX1</i>    | AW461910 | Hs.498154 | 2.7  | <i>UMP-CMPK</i>  | BF043025 | Hs.11463  | 3.1  |
| <i>SNX10</i>   | AW463500 | Hs.418132 | 3.5  | <i>UNC5D</i>     | AW463182 | Hs.238889 | 5.6  |
| <i>SOAT1</i>   | AW466137 | Hs.446331 | 10.4 | <i>URKLI</i>     | AW464011 | Hs.504998 | 2.2  |
| <i>SOD2</i>    | AW464289 | Hs.384944 | 2.7  | <i>USP3</i>      | BM364483 | Hs.251636 | 4.6  |
| <i>SOLH</i>    | AW463803 | Hs.416262 | 5    | <i>USP9X</i>     | AW464043 | Hs.77578  | 2.6  |
| <i>SORD</i>    | AW465736 | Hs.878    | 15.1 | <i>VAPA</i>      | AW465016 | Hs.165195 | 8.4  |
| <i>Spc24</i>   | BM364569 | Hs.381225 | 8.3  | <i>VATI</i>      | BF039809 | Hs.157236 | 2.7  |
| <i>SPEC2</i>   | AW462199 | Hs.5985   | 10.3 | <i>VDAC3</i>     | AW464712 | Hs.439253 | 2    |
| <i>SPIC</i>    | BM365637 | Hs.511791 | 12.5 | <i>VIM</i>       | BF042212 | Hs.435800 | 17.3 |
| <i>SPINT2</i>  | AW464365 | Hs.31439  | 6    | <i>VKORC1</i>    | AW462667 | Hs.324844 | 2.5  |
| <i>Spir-1</i>  | BM363993 | Hs.16758  | 2.3  | <i>WARS</i>      | BM362508 | Hs.82030  | 2.6  |
| <i>SPPL3</i>   | BM366274 | Hs.21143  | 2.4  | <i>WASL</i>      | BF046692 | Hs.182469 | 2.4  |
| <i>SRM</i>     | BF039661 | Hs.76244  | 2    | <i>WDR22</i>     | AW464079 | Hs.284294 | 3.2  |
| <i>SRRM2</i>   | BF042876 | Hs.433343 | 2.4  | <i>WDR5</i>      | AW464559 | Hs.397638 | 4.4  |
| <i>SSBP1</i>   | BF044515 | Hs.923    | 3.2  | <i>WDR7</i>      | BF044912 | Hs.428344 | 3.8  |
| <i>ST14</i>    | BF046516 | Hs.56937  | 3    | <i>WNT4</i>      | AW462911 | Hs.302428 | 13.4 |
| <i>STARD4</i>  | BF044164 | Hs.93842  | 2.3  | <i>WNT6</i>      | AW461778 | Hs.29764  | 2    |
| <i>STARD7</i>  | AW463035 | Hs.445446 | 2.8  | <i>WSB2</i>      | AW465418 | Hs.459470 | 2    |
| <i>STMN1</i>   | BF042135 | Hs.209983 | 4.2  | <i>WWP2</i>      | BF039899 | Hs.315485 | 2    |
| <i>STRBP</i>   | AW464757 | Hs.287659 | 2.2  | <i>XDH</i>       | BM363963 | Hs.250    | 10.4 |
| <i>SUCLA2</i>  | BF046198 | Hs.182217 | 3.5  | <i>XLKDI</i>     | BF041814 | Hs.17917  | 8    |
| <i>SULT1E1</i> | BF044128 | Hs.54576  | 4.9  | <i>XTP3TPB</i>   | BF044941 | Hs.438336 | 2.2  |
| <i>TIA-2</i>   | BF041289 | Hs.468675 | 25.6 | <i>YWHAB</i>     | BF045644 | Hs.279920 | 2.3  |
| <i>TACC1</i>   | BF041576 | Hs.279245 | 10.2 | <i>ZC3HAV1</i>   | AW461704 | Hs.35254  | 5.1  |
| <i>TACSTD1</i> | AW461992 | Hs.692    | 15.1 | <i>ZNF261</i>    | AW465324 | Hs.9568   | 2.5  |
| <i>TACSTD2</i> | AW464668 | Hs.23582  | 14.2 | <i>ZNF36</i>     | BF039448 | Hs.24758  | 2.4  |
| <i>TAF11</i>   | BF044799 | Hs.83126  | 2.4  | <i>ZNF507</i>    | BF041963 | Hs.144028 | 2.9  |
| <i>TAGLN2</i>  | AW462704 | Hs.406504 | 3.6  |                  | BF042469 | TC191194  | 43.5 |
| <i>TAP1</i>    | BM362685 | Hs.352018 | 2.1  |                  | AW463280 | Bt.22083  | 39.4 |
| <i>TARDBP</i>  | AW462241 | Hs.193989 | 3.8  |                  | AW463041 | Hs.193784 | 30.2 |
| <i>TAZ</i>     | BF043675 | Hs.24341  | 5.1  |                  | BF041028 | TC212143  | 24.9 |
| <i>TD-60</i>   | AW462923 | Hs.380857 | 3.8  |                  | AW465165 | Hs.102495 | 18   |
| <i>TEB4</i>    | BF041383 | Hs.380875 | 3.3  |                  | BF042149 | Hs.435132 | 17.6 |
| <i>TFAP2C</i>  | AW465006 | Hs.440411 | 7.7  |                  | AW463374 | Bt.13829  | 13.8 |
| <i>TFDP1</i>   | BF039312 | Hs.79353  | 2.2  |                  | BF045509 | Hs.33032  | 13.6 |
| <i>TIF1</i>    | AW465616 | Hs.183858 | 2.5  |                  | AW463223 | Hs.19218  | 12.3 |
| <i>TIMM23</i>  | BF043914 | Hs.11866  | 11.6 |                  | AW465686 | Bt.13829  | 10.4 |
| <i>TIMM8A</i>  | AW466009 | Hs.447877 | 2.6  |                  | BF041555 | TC220396  | 9.5  |
| <i>TJP2</i>    | BF045365 | Hs.75608  | 12.1 |                  | AW465635 |           | 9.3  |
| <i>TJP3</i>    | AW465835 | Hs.25527  | 3.3  |                  | BF042299 | TC197677  | 8.9  |
| <i>TLE4</i>    | BF042408 | Hs.494269 | 2.7  |                  | BF040852 |           | 8.9  |
| <i>TMG4</i>    | BF041033 | Hs.471695 | 19.3 |                  | BF042130 |           | 8.8  |
| <i>TNFAIP8</i> | AW465089 | Hs.17839  | 2.2  |                  | BF228464 | TC211716  | 8.7  |
| <i>TNRC15</i>  | BF044620 | Hs.334871 | 4.8  |                  | BF044730 | Hs.519677 | 8.7  |
| <i>TOCA1</i>   | AW464149 | Hs.239681 | 8.6  |                  | BF228460 | Bt.23682  | 8    |
| <i>TOMIL2</i>  | BF040770 | Hs.375628 | 6.9  |                  | BF042686 | Hs.432984 | 7.8  |

|                 |          |           |      |          |           |     |
|-----------------|----------|-----------|------|----------|-----------|-----|
| <i>TOMM7</i>    | BM366715 | Hs.112318 | 3.1  | BF040750 | Bt.3946   | 7.8 |
| <i>TOPBP1</i>   | AW464245 | Hs.91417  | 2.9  | BF039327 | Bt.10994  | 7.6 |
| <i>TP53</i>     | BF039832 | Hs.408312 | 2.3  | BF039761 | Bt.15683  | 7.5 |
| <i>TP53INP1</i> | BF041646 | Hs.75497  | 2.7  | BF041274 |           | 7.2 |
| <i>TPD52</i>    | BF044016 | Hs.162089 | 5.3  | AW462843 | Bt.1173   | 6.9 |
| <i>TPM3</i>     | BF040828 | Hs.178468 | 2.7  | AW462277 | Bt.5043   | 6.9 |
| <i>TPR</i>      | BF044256 | Hs.170472 | 2.6  | AW465149 | Hs.349656 | 6.7 |
| <i>TPX2</i>     | BM364843 | Hs.9329   | 7.4  | BF044073 | Hs.17240  | 6.7 |
| <i>TRA16</i>    | BF046587 | Hs.446931 | 3.3  | BF044739 | Hs.210582 | 6.6 |
| <i>TRAP1</i>    | AW464926 | Hs.183803 | 2    | BM366817 |           | 6.3 |
| <i>TRIM28</i>   | BF044024 | Hs.433612 | 2.4  | BF040044 | TC215734  | 6.2 |
| <i>TRIM6</i>    | BF040867 | Hs.350518 | 2.8  | BF040433 | Hs.512230 | 6.2 |
| <i>TUBB</i>     | AW466180 | Hs.512712 | 4.1  | BF039970 |           | 6   |
| <i>TUBG1</i>    | AW465354 | Hs.21635  | 2.2  | BF046725 | Hs.289044 | 5.9 |
| <i>TUBGCP2</i>  | BF045659 | Hs.372093 | 5.7  | BF041570 | Bt.1609   | 5.9 |
| <i>TXN2</i>     | AW464776 | Hs.211929 | 2.1  | AW465864 |           | 5.8 |
| <i>U2AF1</i>    | BF040584 | Hs.365116 | 2.6  | BF044832 | TC193974  | 5.7 |
| <i>UBE2C</i>    | BF040263 | Hs.93002  | 3    | AW464758 | Bt.22845  | 5.5 |
| <i>UBE2G2</i>   | AW465767 | Hs.250387 | 4.7  | BF042796 | TC199764  | 5.4 |
| <i>UBE2N</i>    | AW463008 | Hs.458359 | 4.7  | BF041965 | Bt.22285  | 5.4 |
| <i>UBE2V2</i>   | BF044848 | Hs.371278 | 2    | BF042975 |           | 5.3 |
| <i>UMPS</i>     | BF044448 | Hs.2057   | 4.4  | BF043511 | BF043511  | 5   |
| <i>UPF2</i>     | AW464491 | Hs.3862   | 2.6  | AW461416 | Hs.490420 | 5   |
| <i>UPF3B</i>    | AW466034 | Hs.103832 | 5.4  | AW463777 | Hs.447674 | 5   |
| <i>UQCR</i>     | BM362465 | Hs.8372   | 2.2  | AW464959 |           | 4.9 |
| <i>UQCRC1</i>   | BF039504 | Hs.119251 | 2.9  | BF041621 | Bt.21027  | 4.8 |
| <i>UQCRC2</i>   | AW463939 | Hs.173554 | 3.1  | BF044193 | TC209914  | 4.7 |
| <i>USMG5</i>    | BM362588 | Hs.171625 | 2.4  | BF040089 | Hs.24359  | 4.7 |
| <i>USP31</i>    | BF043928 | Hs.334477 | 7.6  | AW465712 | Bt.21836  | 4.6 |
| <i>VDAC2</i>    | AW464708 | Hs.355927 | 3.3  | AW465150 | Bt.5266   | 4.6 |
| <i>VEGF</i>     | AW465887 | Hs.73793  | 2.5  | AW465772 | Bt.5266   | 4.4 |
| <i>VGLL1</i>    | AW464366 | Hs.9030   | 13.2 | AW463465 |           | 4.3 |
| <i>VIL2</i>     | BF045212 | Hs.403997 | 3.4  | BF042496 | BF042496  | 4.3 |
| <i>VprBP</i>    | AW464947 | Hs.118738 | 2.1  | BF042812 | Bt.23339  | 4.3 |
| <i>VTI1B</i>    | AW463476 | Hs.419995 | 2.2  | AW462309 | AW462309  | 4.1 |
| <i>WBSCR1</i>   | AW462423 | Hs.180900 | 2.3  | BF043244 | Hs.525391 | 4.1 |
| <i>WBSCR14</i>  | BF042632 | Hs.285681 | 3.2  | BF044238 |           | 4.1 |
| <i>WIRE</i>     | BF039273 | Hs.421622 | 2.6  | AW462110 | AW462110  | 3.8 |
| <i>XBP1</i>     | AW463097 | Hs.437638 | 3.5  | AW464485 | Hs.240443 | 3.8 |
| <i>XPNPEP1</i>  | BF042991 | Hs.390623 | 2.6  | BF039075 |           | 3.8 |
| <i>XTP2</i>     | BF040710 | Hs.446197 | 3    | AW461928 | Hs.485796 | 3.8 |
| <i>ZCWCC1</i>   | BF041659 | Hs.143840 | 2.2  | AW465968 | Hs.38034  | 3.8 |
| <i>ZDHHC5</i>   | AW466083 | Hs.27239  | 4.2  | BF046578 | BF046578  | 3.8 |
| <i>ZFP29</i>    | BF046066 | Hs.444502 | 12.4 | BF042740 | Hs.512358 | 3.7 |
| <i>ZFP36</i>    | AW462140 | Hs.343586 | 6.1  | AW462700 | Hs.412624 | 3.7 |
| <i>ZFP95</i>    | BF043911 | Hs.110839 | 2.2  | BF041967 | Bt.9131   | 3.7 |
| <i>ZNF160</i>   | BF039087 | Hs.271511 | 5    | BF042505 |           | 3.6 |
| <i>ZNF174</i>   | BM364844 | Hs.155204 | 2.1  | BM363909 | Hs.356766 | 3.6 |
| <i>ZNF272</i>   | BF046535 | Hs.99971  | 5.4  | AW464336 | Bt.1537   | 3.5 |
|                 | BF044514 | Hs.519367 | 42.3 | BF043276 | TC193186  | 3.5 |
|                 | AW466184 | Hs.491848 | 40.8 | BF045349 | Bt.12423  | 3.4 |
|                 | BF041834 | Bt.23516  | 29.3 | AW463847 | Bt.17180  | 3.4 |

|          |           |      |          |           |     |
|----------|-----------|------|----------|-----------|-----|
| BF040595 | Bt.23516  | 26.7 | AW466044 | Hs.435773 | 3.3 |
| BM365311 | Bt.10879  | 24.5 | BF044217 | Hs.310360 | 3.3 |
| BF039365 | Bt.10169  | 21.4 | AW464436 | TC194752  | 3.3 |
| BM362357 | Bt.20905  | 17.1 | AW465776 | Bt.12588  | 3.3 |
| AW463193 |           | 15.7 | AW463405 | Bt.19460  | 3.3 |
| BM366853 | BM366853  | 15.4 | BF040956 | Hs.330384 | 3.2 |
| BF042668 | BF042668  | 15   | BF039581 | Hs.401218 | 3.2 |
| BF039937 | Hs.504172 | 14.6 | BF043194 |           | 3.2 |
| BF040144 | Bt.6457   | 13.5 | AW465553 | Hs.154336 | 3.2 |
| AW463423 | TC211021  | 12.2 | AW461754 |           | 3.2 |
| BF044039 | TC194474  | 11.9 | AW464181 |           | 3.1 |
| BF042046 |           | 10.3 | AW462030 | Bt.3362   | 3.1 |
| BF041704 | Bt.7035   | 9.7  | AW466064 | TC198712  | 3.1 |
| BM361923 | Hs.12853  | 9.2  | BF044125 | TC193697  | 3.1 |
| BF044557 | Bt.19405  | 8.9  | BF044414 | Bt.20258  | 2.9 |
| AW465539 | Bt.12147  | 8.8  | BF045259 | TC201643  | 2.9 |
| BF042421 | Bt.7035   | 7.7  | BF040324 | Hs.133864 | 2.9 |
| AW466145 | Hs.485604 | 6.6  | BF045289 | Bt.8718   | 2.9 |
| AW462701 | Bt.9217   | 6.6  | BF041590 | Hs.197076 | 2.9 |
| AW462726 | Bt.22747  | 6.5  | AW461822 | TC213420  | 2.9 |
| BF039348 | BF039348  | 6.3  | BF044408 | TC220888  | 2.9 |
| BF039352 | BF039352  | 6.1  | BF042309 | BF042309  | 2.9 |
| BF043184 | BF043184  | 6    | AW463853 | AW463853  | 2.8 |
| BF042155 |           | 6    | AW464394 | Hs.274352 | 2.8 |
| AW466084 | Bt.5386   | 5.9  | BF046504 | BF046504  | 2.8 |
| BF045761 | BF045761  | 5.7  | AW464231 | Bt.7021   | 2.8 |
| AW462102 | AW462102  | 5.7  | BF046275 | Bt.6508   | 2.8 |
| BF046625 | Bt.6726   | 5.7  | BM364995 | TC210468  | 2.8 |
| BF044551 | Bt.13870  | 5.6  | BF044141 |           | 2.8 |
| BF039828 | Bt.4412   | 5.5  | BF042955 | BF042955  | 2.7 |
| AW464517 | Bt.22607  | 5.1  | BF043900 |           | 2.7 |
| AW464533 | Hs.486963 | 5    | AW464091 | Bt.3094   | 2.7 |
| AW462296 |           | 5    | BF039315 |           | 2.6 |
| BF045076 | Bt.6612   | 4.9  | BF045093 | Bt.5089   | 2.6 |
| AW464982 | Bt.3352   | 4.9  | AW466156 |           | 2.6 |
| BF042781 |           | 4.7  | BF046442 | Bt.15887  | 2.6 |
| AW463750 | Bt.12177  | 4.5  | AW465789 | Bt.17659  | 2.6 |
| BF040698 |           | 4.4  | BF042802 | Hs.520231 | 2.5 |
| BF043988 | TC211858  | 4.4  | BF041679 | Hs.154929 | 2.5 |
| BF041155 | Bt.24251  | 4.3  | AW464759 | Bt.16981  | 2.5 |
| BF042235 | TC199597  | 4.2  | BF046268 | Hs.16346  | 2.5 |
| AW465558 | TC205756  | 4.2  | BM364910 | Hs.371274 | 2.4 |
| AW463677 | Bt.9985   | 4.1  | BF040935 | BF040935  | 2.4 |
| BF041308 | Hs.473538 | 4    | AW465703 | Bt.9668   | 2.4 |
| AW464066 | Bt.6250   | 3.9  | AW463907 | Hs.454881 | 2.4 |
| AW461591 | Bt.6019   | 3.8  | BF046724 | Hs.239870 | 2.4 |
| BF042818 | Bt.23487  | 3.8  | BF044670 | Mm.252481 | 2.4 |
| AW464930 | Hs.105636 | 3.7  | BF041811 | BF041811  | 2.4 |
| BF046663 |           | 3.7  | AW464721 | AW464721  | 2.4 |
| AW465621 | Hs.351680 | 3.4  | BF044045 | Hs.199705 | 2.4 |
| AW462353 | Bt.15791  | 3.3  | AW465164 | Hs.432862 | 2.4 |
| BF043689 | Bt.18283  | 3.3  | BF044626 | Hs.519290 | 2.3 |

|          |           |     |          |           |     |
|----------|-----------|-----|----------|-----------|-----|
| BF040579 |           | 3.2 | AW464379 |           | 2.3 |
| BF044359 | TC212909  | 3.2 | AW465325 | Hs.19340  | 2.3 |
| BF042909 | Hs.441127 | 3.2 | BF044838 | Bt.21732  | 2.3 |
| BF045888 |           | 3.2 | BF045148 | Bt.6456   | 2.3 |
| BF043117 | Bt.9580   | 3.1 | AW463136 | AW463136  | 2.3 |
| AW466210 | Hs.504270 | 3   | BF045354 | Hs.448705 | 2.3 |
| AW466172 |           | 3   | BF039906 | Hs.524254 | 2.3 |
| BF044069 | Bt.20515  | 3   | AW465023 |           | 2.2 |
| BF042999 | Bt.12564  | 3   | AW465334 | AW465334  | 2.2 |
| BF040216 |           | 2.9 | BF043441 | Bt.16982  | 2.2 |
| BF040773 |           | 2.9 | AW464312 | TC215960  | 2.2 |
| AW465279 | Bt.1465   | 2.9 | BM364471 | Hs.336425 | 2.2 |
| BF039334 | Hs.434077 | 2.9 | BF042933 | TC194220  | 2.2 |
| BF045945 | Hs.460717 | 2.8 | AW464480 | Bt.20775  | 2.2 |
| BF040843 | Bt.9542   | 2.8 | AW463016 | AW463016  | 2.2 |
| BF043921 | BF043921  | 2.8 | AW466063 | AW466063  | 2.1 |
| BF044521 | Bt.17762  | 2.8 | BF040300 | Bt.20914  | 2.1 |
| AW463806 | TC213320  | 2.7 | AW465771 | Hs.60257  | 2.1 |
| AW463719 | Bt.5266   | 2.7 | BF040988 |           | 2.1 |
| BF042331 | TC212164  | 2.7 | BF039593 | Bt.8828   | 2.1 |
| BF042990 | TC204354  | 2.7 | BF046691 | Hs.27048  | 2.1 |
| BF043888 | TC215036  | 2.7 | AW465652 | Bt.1000   | 2.1 |
| AW462829 | Bt.2467   | 2.6 | BF040753 | Bt.16233  | 2   |
| BM364839 | Hs.343588 | 2.6 | BM364815 | Bt.11260  | 2   |
| BF044764 |           | 2.6 | BM364954 | Hs.512306 | 2   |
| BF043123 | Bt.23034  | 2.6 | AW465481 |           | 2   |
| BF044855 | Bt.11339  | 2.6 | BF040789 | Hs.283575 | 2   |
| AW465281 | Hs.105636 | 2.5 |          |           |     |
| BF042273 | BF042273  | 2.5 |          |           |     |
| BF040190 | Mm.332140 | 2.5 |          |           |     |
| BF039785 | Bt.6431   | 2.5 |          |           |     |
| BF041210 | Bt.18934  | 2.4 |          |           |     |
| BF044080 | Bt.15809  | 2.4 |          |           |     |
| AW463962 | TC198668  | 2.4 |          |           |     |
| BF228462 | Bt.6627   | 2.4 |          |           |     |
| BF045800 | BF045800  | 2.4 |          |           |     |
| AW462711 | Bt.7917   | 2.3 |          |           |     |
| AW461660 | Bt.7434   | 2.3 |          |           |     |
| BF044908 | Bt.17347  | 2.3 |          |           |     |
| BF043647 | Hs.444182 | 2.3 |          |           |     |
| BF043919 | Bt.9263   | 2.3 |          |           |     |
| BF045967 | Bt.9650   | 2.3 |          |           |     |
| AW466120 | Bt.16747  | 2.3 |          |           |     |
| AW464881 | Hs.517644 | 2.3 |          |           |     |
| BF043741 | TC196187  | 2.3 |          |           |     |
| AW465896 | Bt.16905  | 2.3 |          |           |     |
| BM364829 | Hs.463043 | 2.2 |          |           |     |
| AW465982 | Bt.1797   | 2.2 |          |           |     |
| AW463973 |           | 2.2 |          |           |     |

|          |           |     |
|----------|-----------|-----|
| BF044218 |           | 2.2 |
| AW461534 |           | 2.2 |
| BF045980 | Bt.4059   | 2.2 |
| AW462794 | TC199059  | 2.2 |
| BF039480 | Hs.512829 | 2.2 |
| BM366764 | Hs.104520 | 2.2 |
| BF042200 | Bt.9734   | 2.2 |
| AW465649 | Bt.3830   | 2.2 |
| BF039323 |           | 2.2 |
| AW464938 |           | 2.2 |
| AW462445 |           | 2.2 |
| AW461544 | TC196804  | 2.2 |
| BF046135 | Hs.163742 | 2.2 |
| BF043234 | Hs.523076 | 2.1 |
| BF042383 | Hs.433254 | 2.1 |
| BF044457 | Hs.292457 | 2.1 |
| BF044297 | Hs.517832 | 2   |
| BF040951 | BF040951  | 2   |
| BF046308 | Bt.6537   | 2   |
| AW465254 | Bt.20185  | 2   |
| BF039595 |           | 2   |
| BF041434 | BF041434  | 2   |

---

\*Some sequences do not have human/mouse UniGene IDs and are annotated with the Cattle UniGene/TIGR names or are previously unannotated bovine sequences.

†Fold change represents the ratio of the embryos:standard reference divided by the ratio of the donor cells:standard reference.

‡Fold change represents the ratio of the donor cells:standard reference divided by the ratio of the embryos:standard reference.
