# Supplementary material
Source: PubMed Central journal article supplement (PMC1308920)
Supplement: pnas_0508952102_4.pdf [file pnas_0508952102_4.pdf]

**Table 6. Genes differentially expressed when compared with the IVF embryos**

| Comparison                                                                         | Symbol           | Seq. Identifier | UniGene ID* | Fold $\Delta^{\dagger}$ |
|------------------------------------------------------------------------------------|------------------|-----------------|-------------|-------------------------|
| <b>Uniquely expressed genes: AI compared with IVF embryos <math>n = 123</math></b> |                  |                 |             |                         |
| <b>Genes up-regulated in AI embryos</b>                                            |                  |                 |             |                         |
|                                                                                    |                  | BM362914        | Hs.525992   | 2.9                     |
|                                                                                    | <i>FBXO32</i>    | AW464353        | Hs.403933   | 2.8                     |
|                                                                                    | <i>TOMM7</i>     | BM366715        | Hs.112318   | 2.8                     |
|                                                                                    |                  | BM364527        | Bt.10140    | 2.7                     |
|                                                                                    | <i>C3orf6</i>    | BF045000        | Hs.55098    | 2.7                     |
|                                                                                    | <i>FKSG28</i>    | BM364614        | Hs.512762   | 2.6                     |
|                                                                                    |                  | BF042812        | Bt.23339    | 2.6                     |
|                                                                                    |                  | BM364571        | Hs.525992   | 2.6                     |
|                                                                                    | <i>DAB2</i>      | BF040210        | Hs.81988    | 2.5                     |
|                                                                                    |                  | BF042933        | TC194220    | 2.5                     |
|                                                                                    | <i>EPHX2</i>     | BF046427        | Hs.212088   | 2.5                     |
|                                                                                    | <i>LOC112840</i> | BF039946        | Hs.22268    | 2.4                     |
|                                                                                    | <i>SLCIA3</i>    | BF042208        | Hs.371369   | 2.4                     |
|                                                                                    |                  | BM364635        |             | 2.4                     |
|                                                                                    | <i>KAI1</i>      | BM364563        | Hs.323949   | 2.4                     |
|                                                                                    | <i>SULT1E1</i>   | BF044128        | Hs.54576    | 2.4                     |
|                                                                                    | <i>SH120</i>     | BF044826        | Hs.504478   | 2.4                     |
|                                                                                    | <i>CD48</i>      | BF043735        | Hs.901      | 2.3                     |
|                                                                                    | <i>FUK</i>       | BF045361        | Hs.7907     | 2.3                     |
|                                                                                    | <i>LSM8</i>      | BF043473        | Hs.446179   | 2.3                     |
|                                                                                    | <i>ADNP</i>      | BM365941        | Hs.448540   | 2.3                     |
|                                                                                    |                  | AW464537        | TC213518    | 2.3                     |
|                                                                                    | <i>FLJ11184</i>  | BF045538        | Hs.267446   | 2.3                     |
|                                                                                    | <i>LRP2</i>      | BF042084        | Hs.252938   | 2.2                     |
|                                                                                    | <i>RPL35A</i>    | BF045042        | Hs.289093   | 2.2                     |
|                                                                                    |                  | AW462522        |             | 2.2                     |
|                                                                                    | <i>RIC1</i>      | AW463851        | Hs.203605   | 2.2                     |
|                                                                                    |                  | BF041595        | Bt.22712    | 2.2                     |
|                                                                                    | <i>KIAA0767</i>  | BF039242        | Hs.95180    | 2.2                     |
|                                                                                    | <i>HADH2</i>     | AW465125        | Hs.171280   | 2.2                     |
|                                                                                    |                  | BM366203        | Bt.13757    | 2.2                     |
|                                                                                    | <i>HSGP25L2G</i> | BM366458        | Hs.279929   | 2.2                     |
|                                                                                    |                  | BF043988        | TC211858    | 2.2                     |
|                                                                                    | <i>C9orf5</i>    | AW465543        | Hs.418097   | 2.2                     |
|                                                                                    | <i>SRF</i>       | BF039881        | Hs.444086   | 2.2                     |
|                                                                                    | <i>PAI-RBP1</i>  | BM366101        | Hs.356427   | 2.2                     |
|                                                                                    |                  | BF045485        |             | 2.2                     |
|                                                                                    | <i>SPC12</i>     | BF045672        | Hs.11125    | 2.2                     |
|                                                                                    | <i>HP1-BP74</i>  | BM362315        | Hs.142442   | 2.2                     |
|                                                                                    | <i>KIAA0373</i>  | BF044427        | Hs.150444   | 2.1                     |
|                                                                                    | <i>LAT</i>       | BM364562        | Hs.498997   | 2.1                     |
|                                                                                    | <i>SMP1</i>      | AW465914        | Hs.475792   | 2.1                     |
|                                                                                    | <i>SMC1L1</i>    | BF046644        | Hs.211602   | 2.1                     |
|                                                                                    | <i>CBFA2T2</i>   | AW464623        | Hs.153934   | 2.1                     |
|                                                                                    | <i>NUDC</i>      | BM365709        | Hs.263812   | 2.1                     |
|                                                                                    | <i>LOC124491</i> | BF044455        | Hs.487510   | 2.1                     |
|                                                                                    | <i>FLJ20696</i>  | BM364565        | Hs.236844   | 2.1                     |
|                                                                                    | <i>PDGFRA</i>    | BM362352        | Hs.74615    | 2.1                     |

|                 |          |           |     |
|-----------------|----------|-----------|-----|
| <i>FLJ10853</i> | BF046465 | Hs.445512 | 2.1 |
| <i>COX17</i>    | BM362515 | Hs.16297  | 2.1 |
| <i>CBX1</i>     | BF044531 | Hs.77254  | 2.1 |
| <i>PPP1R13B</i> | BF040615 | Hs.371546 | 2.1 |
| <i>PPIH</i>     | BF043671 | Hs.9880   | 2.1 |
| <i>FABP3</i>    | BM363051 | Hs.112669 | 2.1 |
| <i>STMN1</i>    | BF042135 | Hs.209983 | 2.1 |
| <i>KIAA0251</i> | BF041627 | Hs.439211 | 2.1 |
|                 | BM361857 | Hs.448626 | 2   |
| <i>MGC14817</i> | AW464175 | Hs.504820 | 2   |
|                 | AW462726 | Bt.22747  | 2   |
| <i>MGC2650</i>  | BF042119 | Hs.386422 | 2   |
| <i>CASP6</i>    | AW464593 | Hs.3280   | 2   |
| <i>DAPP1</i>    | BF043679 | Hs.62643  | 2   |
| <i>TIGD2</i>    | BF040734 | Hs.58924  | 2   |
|                 | BF041590 | Hs.197076 | 2   |
| <i>QP-C</i>     | BF039168 | Hs.146602 | 2   |
| <i>MAPBPIP</i>  | BF042143 | Hs.351629 | 2   |
| <i>GNG11</i>    | BM361956 | Hs.83381  | 2   |
| <i>SE57-1</i>   | AW463203 | Hs.30315  | 2   |

**Genes up-regulated in IVF embryos**

|                 |          |           |     |
|-----------------|----------|-----------|-----|
| <i>FZD4</i>     | AW464374 | Hs.19545  | 3.5 |
| <i>PFKFB3</i>   | AW465288 | Hs.195471 | 3.2 |
|                 | BF041155 | Bt.24251  | 3   |
| <i>AFG3L1</i>   | BF044093 | Hs.337620 | 2.9 |
| <i>ZNF75</i>    | BF043271 | Hs.355015 | 2.9 |
| <i>ITSN2</i>    | BM366528 | Hs.444708 | 2.8 |
| <i>SGPL1</i>    | BF045752 | Hs.186613 | 2.8 |
| <i>SERPINE1</i> | BF044893 | Hs.414795 | 2.8 |
|                 | BF044908 | Bt.17347  | 2.7 |
| <i>GPR64</i>    | AW461648 | Hs.421137 | 2.6 |
| <i>ANKRD1</i>   | AW464818 | Hs.448589 | 2.6 |
| <i>P15RS</i>    | BF041744 | Hs.300906 | 2.6 |
|                 | BF044557 | Bt.19405  | 2.5 |
|                 | AW463292 | Hs.527733 | 2.5 |
| <i>GFPT1</i>    | BF045423 | Hs.1674   | 2.5 |
| <i>DAP</i>      | AW465882 | Hs.75189  | 2.4 |
| <i>KIAA0063</i> | BF042858 | Hs.3094   | 2.4 |
| <i>LIPH</i>     | AW462817 | Hs.68864  | 2.4 |
| <i>IL15RA</i>   | AW462714 | Hs.12503  | 2.4 |
| <i>CHS1</i>     | AW462482 | Hs.130188 | 2.4 |
| <i>DUSP1</i>    | AW464709 | Hs.171695 | 2.4 |
| <i>LPP</i>      | BF046650 | Hs.180398 | 2.3 |
| <i>KIAA0063</i> | BF042961 | Hs.3094   | 2.3 |
| <i>RGS12</i>    | BF044618 | Hs.434933 | 2.3 |
| <i>ELF1</i>     | AW463979 | Hs.124030 | 2.3 |
| <i>GATA3</i>    | BF046526 | Hs.169946 | 2.3 |
| <i>ARHGEF5</i>  | BF042105 | Hs.334    | 2.3 |
| <i>LOC90826</i> | BM362608 | Hs.29645  | 2.3 |
| <i>KIAA1598</i> | BF046130 | Hs.98002  | 2.2 |
| <i>SCA2</i>     | BF041270 | Hs.76253  | 2.2 |
| <i>LAMB1</i>    | AW463880 | Hs.122645 | 2.2 |

|                     |          |           |     |
|---------------------|----------|-----------|-----|
| <i>STAM</i>         | BF040813 | Hs.441498 | 2.2 |
| <i>C7orf2</i>       | BF043945 | Hs.397295 | 2.1 |
| <i>TEX27</i>        | AW462751 | Hs.6120   | 2.1 |
| <i>ZFP36</i>        | AW462140 | Hs.343586 | 2.1 |
| <i>SSH2</i>         | BF046189 | Hs.25127  | 2.1 |
| <i>PGM3</i>         | BF046419 | Hs.237323 | 2.1 |
| <i>DMTF1</i>        | BF046571 | Hs.129506 | 2.1 |
|                     | AW465481 |           | 2.1 |
| <i>BS69</i>         | BF040504 | Hs.145894 | 2.1 |
| <i>CBL</i>          | BF043814 | Hs.41324  | 2.1 |
| <i>PRDM4</i>        | BF046524 | Hs.21807  | 2.1 |
| <i>AP2B1</i>        | BF046011 | Hs.370123 | 2.1 |
| <i>ABCD3</i>        | BF042967 | Hs.76781  | 2   |
|                     | BF039352 |           | 2   |
| <i>DKFZp762I137</i> | BM365552 | Hs.201648 | 2   |
| <i>KIAA0196</i>     | AW461532 | Hs.437991 | 2   |
| <i>SENP5</i>        | BF045812 | Hs.13138  | 2   |
|                     | BF044685 | Hs.284192 | 2   |
| <i>PTPLB</i>        | AW464130 | Hs.5957   | 2   |
| <i>HNRPA2B1</i>     | BF044057 | Hs.232400 | 2   |
| <i>LDHA</i>         | AW464637 | Hs.2795   | 2   |
| <i>ARHB</i>         | AW464871 | Hs.406064 | 2   |
| <i>ARHGAP21</i>     | BF041260 | Hs.414164 | 2   |
| <i>BHD</i>          | AW465536 | Hs.396533 | 2   |

**Uniquely expressed genes: IVF compared with NT embryos  $n=67$**

**Genes up-regulated in NT embryos**

|                 |          |           |     |
|-----------------|----------|-----------|-----|
|                 | BF040607 | Hs.43744  | 3.5 |
| <i>IPO7</i>     | BF045355 | Hs.434408 | 3.2 |
|                 | BF040483 | TC202969  | 2.7 |
|                 | BM364859 | Hs.458365 | 2.6 |
| <i>SUCLG2</i>   | AW461539 | Hs.446476 | 2.6 |
| <i>IL1RN</i>    | AW464284 | Hs.81134  | 2.5 |
| <i>TXNIP</i>    | AW462086 | Hs.179526 | 2.5 |
| <i>ZADH1</i>    | BF045231 | Hs.98365  | 2.4 |
| <i>EIF4A2</i>   | BF040878 | Hs.511904 | 2.4 |
| <i>HNRPH3</i>   | BF041471 | Hs.156481 | 2.4 |
| <i>ACVR2</i>    | BF039418 | Hs.389846 | 2.3 |
| <i>RNASEH2A</i> | BF044821 | Hs.25292  | 2.3 |
| <i>SNX12</i>    | AW465072 | Hs.260750 | 2.3 |
| <i>FLJ22679</i> | AW462688 | Hs.5472   | 2.2 |
| <i>CGI-79</i>   | BM364884 | Hs.61184  | 2.2 |
| <i>FLJ12525</i> | BF044559 | Hs.356573 | 2.2 |
| <i>MKKS</i>     | BM362051 | Hs.46743  | 2.2 |
| <i>PLCB4</i>    | BF044560 | Hs.151408 | 2.2 |
| <i>BCAS2</i>    | BF040123 | Hs.22960  | 2.1 |
|                 | BF041434 |           | 2.1 |
| <i>SDHC</i>     | AW465250 | Hs.433982 | 2.1 |
| <i>KIAA0036</i> | AW465525 | Hs.435802 | 2.1 |
| <i>TP53INP1</i> | BF043124 | Hs.75497  | 2.1 |
| <i>ADPRT</i>    | BF044761 | Hs.177766 | 2.1 |
| <i>C6orf119</i> | AW465061 | Hs.80624  | 2.1 |
| <i>IL13RA1</i>  | BF040232 | Hs.285115 | 2.1 |

|                 |          |           |     |
|-----------------|----------|-----------|-----|
| <i>LOC92345</i> | BF045548 | Hs.332844 | 2.1 |
| <i>HNRPA1</i>   | AW464603 | Hs.356721 | 2.1 |
| <i>CGI-94</i>   | AW465760 | Hs.111449 | 2.1 |
| <i>NOL5A</i>    | BM365616 | Hs.376064 | 2.1 |
| <i>SET</i>      | BF045176 | Hs.436687 | 2.1 |
| <i>NDUFA2</i>   | BM362349 | Hs.163867 | 2   |
|                 | AW463696 | Bt.21510  | 2   |
| <i>ZDHHC5</i>   | AW466083 | Hs.27239  | 2   |
| <i>MGC52022</i> | AW465110 | Hs.175804 | 2   |
| <i>na</i>       | BF041656 | Hs.449674 | 2   |
|                 | AW462445 |           | 2   |
| <i>SARS</i>     | BF042850 | Hs.444261 | 2   |
| <i>HSPC155</i>  | BF040591 | Hs.301412 | 2   |
| <i>AGA</i>      | AW462575 | Hs.207776 | 2   |
| <i>Rdh11</i>    | BF039125 | Mm.291799 | 2   |

**Genes up-regulated in IVF embryos**

|                 |          |           |     |
|-----------------|----------|-----------|-----|
| <i>PARG1</i>    | BF043143 | Hs.430919 | 3.5 |
|                 | BF044626 | Hs.519290 | 3.1 |
| <i>DNAJB1</i>   | BF042255 | Hs.82646  | 2.8 |
| <i>HMGR</i>     | AW463319 | Hs.11899  | 2.5 |
|                 | AW465971 | Hs.325100 | 2.5 |
| <i>SC4MOL</i>   | BF045613 | Hs.393239 | 2.5 |
| <i>ABCC2</i>    | AW465042 | Hs.193852 | 2.5 |
| <i>RNPC2</i>    | BF040025 | Hs.282901 | 2.4 |
| <i>TMG4</i>     | BF041033 | Hs.471695 | 2.4 |
| <i>HTLF</i>     | AW465980 | Hs.103126 | 2.3 |
| <i>PFTK1</i>    | BF046716 | Hs.57856  | 2.3 |
| <i>FLJ22662</i> | AW463050 | Hs.178470 | 2.3 |
| <i>DSC2</i>     | AW464398 | Hs.95612  | 2.3 |
| <i>GAB1</i>     | BF046579 | Hs.80720  | 2.2 |
|                 | BF042686 | Hs.432984 | 2.2 |
|                 | BF040852 |           | 2.1 |
| <i>PIK3AP1</i>  | BM362742 | Hs.374836 | 2.1 |
| <i>C1orf17</i>  | AW466105 | Hs.387995 | 2.1 |
| <i>ETV5</i>     | BF039090 | Hs.43697  | 2.1 |
| <i>BCAR3</i>    | BF043710 | Hs.201993 | 2.1 |
| <i>GCH1</i>     | BF039694 | Hs.86724  | 2.1 |
|                 | AW464533 | Hs.486963 | 2   |
| <i>CT120</i>    | BF042133 | Hs.154396 | 2   |
|                 | BF043269 | Bt.262    | 2   |
| <i>GADD45A</i>  | AW465978 | Hs.80409  | 2   |
| <i>MGC32065</i> | BM366294 | Hs.8705   | 2   |

**Uniquely expressed genes in IVF embryos *n* =58**

|                 |          |           |  |
|-----------------|----------|-----------|--|
|                 | BF041028 | TC212143  |  |
|                 | BM362357 | Bt.20905  |  |
|                 | BF041965 | Bt.22285  |  |
|                 | AW461434 | Bt.262    |  |
|                 | BF044039 | TC194474  |  |
|                 | BF043689 | Bt.18283  |  |
|                 | AW464517 | Bt.22607  |  |
| <i>AB026190</i> | AW465280 | Hs.106290 |  |
| <i>ABCA1</i>    | BF040532 | Hs.147259 |  |

|                 |          |           |
|-----------------|----------|-----------|
| <i>CD59</i>     | BF040446 | Hs.278573 |
| <i>COX7A2</i>   | BF039921 | Hs.70312  |
| <i>CT120</i>    | BF039086 | Hs.154396 |
| <i>DOC1</i>     | BF046207 | Hs.15432  |
| <i>EGR1</i>     | AW465088 | Hs.326035 |
| <i>EIF4A1</i>   | AW466024 | Hs.129673 |
| <i>HDCMA18P</i> | BM366104 | Hs.278635 |
| <i>HES1</i>     | AW465398 | Hs.250666 |
| <i>HMOX1</i>    | BM364921 | Hs.202833 |
| <i>HNRPA2B1</i> | AW464917 | Hs.232400 |
| <i>HNRPC</i>    | BF041354 | Hs.476302 |
| <i>HSD3B1</i>   | BF043416 | Hs.364941 |
| <i>HSPA1B</i>   | AW464005 | Hs.274402 |
| <i>HSPB8</i>    | BM364661 | Hs.111676 |
| <i>HSPCA</i>    | BF041278 | Hs.446579 |
| <i>HSPE1</i>    | BF039685 | Hs.1197   |
| <i>IFI35</i>    | BM366707 | Hs.50842  |
| <i>IQGAP1</i>   | BF040382 | Hs.1742   |
| <i>KIAA0033</i> | AW464100 | Hs.174905 |
| <i>KIAA1128</i> | BF043762 | Hs.81897  |
| <i>MADP-1</i>   | BF046567 | Hs.43847  |
| <i>MGC16063</i> | BM366713 | Hs.410491 |
| <i>MYLIP</i>    | BF045523 | Hs.443793 |
| <i>na</i>       | BF044446 | Mm.300203 |
| <i>NAP1L4</i>   | AW464388 | Hs.269403 |
| <i>NASP</i>     | BF039280 | Hs.446206 |
| <i>NDUFB9</i>   | BF042526 | Hs.15977  |
| <i>NIP30</i>    | BM365995 | Hs.285017 |
| <i>NOLA1</i>    | AW463985 | Hs.69851  |
| <i>PA2G4</i>    | BM365432 | Hs.374491 |
| <i>PABPN1</i>   | BF040928 | Hs.117176 |
| <i>PFDN2</i>    | AW465585 | Hs.298229 |
| <i>PLAU</i>     | AW462038 | Hs.77274  |
| <i>PSID</i>     | BF045707 | Hs.54971  |
| <i>PTP4A2</i>   | AW462951 | Hs.82911  |
| <i>PTPRF</i>    | AW465468 | Hs.75216  |
| <i>SFN</i>      | AW465454 | Hs.184510 |
| <i>SH3BGRL</i>  | BF046438 | Hs.14368  |
| <i>SON</i>      | BF046366 | Hs.430541 |
| <i>SYNCRIP</i>  | BF042093 | Hs.436376 |
| <i>TM4SF12</i>  | BF045969 | Hs.16529  |
| <i>TXNRD1</i>   | BM362012 | Hs.434367 |
| <i>UBL1</i>     | AW465185 | Hs.81424  |
| <i>UBTF</i>     | BM365198 | Hs.89781  |
| <i>UPF3B</i>    | AW466034 | Hs.103832 |
| <i>VprBP</i>    | AW464947 | Hs.118738 |
| <i>WIRE</i>     | BF039273 | Hs.421622 |
| <i>WSB2</i>     | AW465418 | Hs.459470 |
| <i>ZNF146</i>   | BF040005 | Hs.301819 |

\*Some sequences do not have human/mouse UniGene IDs and are annotated with Cattle UniGene/TIGR names or are previously unannotated bovine sequences.

†Fold change represents the ratio of the ratios of each embryo type to the standard reference.
