# Supplementary material
Source: PubMed Central journal article supplement (PMC1308920)
Supplement: pnas_0508952102_5.pdf [file pnas_0508952102_5.pdf]

**Table 7. Genes involved in developmental processes GO, *n* =434**

| <b>Symbol</b>   | <b>Seq. Identifier</b> | <b>UniGene ID*</b> |
|-----------------|------------------------|--------------------|
|                 | BF043309               | Hs.511819          |
|                 | BF041283               | Hs.504964          |
|                 | AW463067               | Hs.179574          |
|                 | BF044966               | Hs.509199          |
|                 | BM364954               | Hs.512306          |
|                 | AW464019               | Hs.203961          |
|                 | AW463150               | Hs.506074          |
|                 | AW461741               | Hs.515249          |
|                 | BF044100               | Hs.521331          |
|                 | AW463943               |                    |
|                 | AW463582               | Hs.373908          |
|                 | BF044463               | Bt.1898            |
|                 | BM364572               |                    |
|                 | AW465699               | Hs.525330          |
|                 | AW465896               | Bt.16905           |
|                 | BF040211               | Hs.449423          |
| <i>ADAM28</i>   | AW461333               | Hs.174030          |
| <i>ADAMDEC1</i> | BF041123               | Hs.145296          |
| <i>AF3P21</i>   | BF043565               | Hs.102929          |
| <i>AGPAT1</i>   | BF045777               | Hs.409230          |
| <i>AKAP11</i>   | BF045445               | Hs.414995          |
| <i>AKAP12</i>   | AW463034               | Hs.197081          |
| <i>AKAP13</i>   | BF039380               | Hs.350631          |
| <i>AKAP9</i>    | BF041822               | Hs.58103           |
| <i>AMFR</i>     | BF041516               | Hs.295137          |
| <i>ANAPC5</i>   | AW465257               | Hs.7101            |
| <i>ANKRD1</i>   | AW464818               | Hs.448589          |
| <i>ANXA1</i>    | BF042369               | Hs.287558          |
| <i>ANXA2</i>    | AW466147               | Hs.462864          |
| <i>ANXA5</i>    | AW461400               | Hs.145741          |
| <i>APPBP2</i>   | BF046670               | Hs.84084           |
| <i>ARF1</i>     | AW463199               | Hs.286221          |
| <i>ARF4</i>     | AW462057               | Hs.435639          |
| <i>ARF4L</i>    | BF045491               | Hs.183153          |
| <i>ARF5</i>     | AW464330               | Hs.430657          |
| <i>ARHA</i>     | AW464331               | Hs.77273           |
| <i>ARHE</i>     | AW464395               | Hs.6838            |
| <i>ARHGDIB</i>  | BF042389               | Hs.292738          |
| <i>ARHGEF3</i>  | BF043067               | Hs.25951           |
| <i>ARHQ</i>     | BF044629               | Hs.442989          |
| <i>ARL10B</i>   | AW462077               | Hs.348709          |
| <i>ARL4</i>     | AW465353               | Hs.245540          |
| <i>ARL7</i>     | BF044311               | Hs.111554          |
| <i>ARNT</i>     | AW463312               | Hs.131494          |
| <i>ARRDC2</i>   | AW463113               | Hs.30882           |
| <i>ASXL1</i>    | BF042599               | Hs.3686            |
| <i>ATP5J</i>    | AW464223               | Hs.246310          |
| <i>AXL</i>      | AW465195               | Hs.83341           |
| <i>BATI</i>     | AW462165               | Hs.254042          |
| <i>BAT2</i>     | BF042416               | Hs.436093          |

|                 |          |           |
|-----------------|----------|-----------|
| <i>BCR</i>      | BF039805 | Hs.446394 |
| <i>BMP2K</i>    | BF041037 | Hs.20137  |
| <i>BRD2</i>     | BF044619 | Hs.75243  |
| <i>BSG</i>      | AW465714 | Hs.501293 |
| <i>BUB3</i>     | AW465572 | Hs.418533 |
| <i>C17orf35</i> | BF041876 | Hs.15196  |
| <i>C5orf7</i>   | BF042776 | Hs.24125  |
| <i>C7orf30</i>  | BF043931 | Hs.87385  |
| <i>C8orf1</i>   | BF045975 | Hs.436445 |
| <i>CALM1</i>    | BF043886 | Hs.282410 |
| <i>CAMK2D</i>   | BF044772 | Hs.111460 |
| <i>CAMK2G</i>   | AW466073 | Hs.12436  |
| <i>CAP1</i>     | AW465076 | Hs.104125 |
| <i>CASP8AP2</i> | AW462328 | Hs.122843 |
| <i>CBLC</i>     | AW463722 | Hs.156637 |
| <i>CCBP2</i>    | BF045645 | Hs.24286  |
| <i>CCDC2</i>    | BF040682 | Hs.275906 |
| <i>CCL11</i>    | AW464252 | Hs.54460  |
| <i>CCL14</i>    | BF046074 | Hs.272493 |
| <i>CCL26</i>    | BM365027 | Hs.131342 |
| <i>CCNI</i>     | AW462171 | Hs.369110 |
| <i>CD151</i>    | AW463121 | Hs.512857 |
| <i>CD164</i>    | AW462000 | Hs.43910  |
| <i>CD2AP</i>    | BF041363 | Hs.374340 |
| <i>CD47</i>     | BF042652 | Hs.446414 |
| <i>CD59</i>     | BF040446 | Hs.278573 |
| <i>CD9</i>      | AW461966 | Hs.387579 |
| <i>CDC37</i>    | AW462059 | Hs.160958 |
| <i>CDC42EP3</i> | AW464998 | Hs.352554 |
| <i>CDK10</i>    | AW463177 | Hs.77313  |
| <i>CDK2</i>     | AW465591 | Hs.19192  |
| <i>CDK2AP1</i>  | AW463586 | Hs.433201 |
| <i>CDKN1C</i>   | AW462929 | Hs.106070 |
| <i>CDYL</i>     | BF043684 | Hs.16081  |
| <i>CENPB</i>    | AW464027 | Hs.85004  |
| <i>CENPH</i>    | AW463474 | Hs.200395 |
| <i>CFL1</i>     | AW466074 | Hs.170622 |
| <i>CHS1</i>     | AW462482 | Hs.130188 |
| <i>CLIC4</i>    | BF043167 | Hs.25035  |
| <i>CNOT7</i>    | BF042498 | Hs.170553 |
| <i>COPI</i>     | BF042569 | Hs.412957 |
| <i>COPS3</i>    | BF043035 | Hs.6076   |
| <i>COPS4</i>    | AW464161 | Hs.6671   |
| <i>COPS5</i>    | AW464681 | Hs.446492 |
| <i>COPS7A</i>   | AW465607 | Hs.125309 |
| <i>CRABP2</i>   | AW466200 | Hs.183650 |
| <i>CRIM1</i>    | BF045277 | Hs.170752 |
| <i>CRKL</i>     | AW465898 | Hs.5613   |
| <i>CSF1R</i>    | BF040002 | Hs.174142 |
| <i>CSNK1A1</i>  | AW465807 | Hs.519667 |
| <i>CSNK1E</i>   | AW465847 | Hs.355669 |
| <i>CSNK1G2</i>  | AW462693 | Hs.181390 |

|                 |          |           |
|-----------------|----------|-----------|
| <i>CSNK1G3</i>  | AW462731 | Hs.129206 |
| <i>CST6</i>     | BF040853 | Hs.139389 |
| <i>CTF1</i>     | BF039551 | Hs.433319 |
| <i>CUTL1</i>    | BF045936 | Hs.438974 |
| <i>DIS155E</i>  | BM365429 | Hs.69855  |
| <i>DAPP1</i>    | BF043679 | Hs.62643  |
| <i>DAZAP2</i>   | AW464715 | Hs.369761 |
| <i>DDX1</i>     | BF042075 | Hs.440599 |
| <i>DDX17</i>    | BF040218 | Hs.349121 |
| <i>DDX19</i>    | AW464225 | Hs.289097 |
| <i>DDX24</i>    | BF043513 | Hs.372267 |
| <i>DDX39</i>    | BF043055 | Hs.311609 |
| <i>DDX5</i>     | AW462568 | Hs.279806 |
| <i>DHX36</i>    | BF042628 | Hs.9414   |
| <i>DIS3</i>     | BF046026 | Hs.323346 |
| <i>DKK1</i>     | BF045944 | Hs.40499  |
| <i>DNAJA2</i>   | BF044731 | Hs.368078 |
| <i>DNCL11</i>   | BF045696 | Hs.351916 |
| <i>DPYSL2</i>   | BM362088 | Hs.173381 |
| <i>DSCR1</i>    | BF041364 | Hs.282326 |
| <i>DTR</i>      | BF042729 | Hs.799    |
| <i>DVL3</i>     | BF039660 | Hs.381928 |
| <i>DXS9928E</i> | BF046010 | Hs.54277  |
| <i>ELF3</i>     | AW463268 | Hs.67928  |
| <i>EP300</i>    | BF045204 | Hs.271730 |
| <i>EPN1</i>     | BF044530 | Hs.279953 |
| <i>ERCC1</i>    | AW463694 | Hs.435981 |
| <i>ERG</i>      | AW463645 | Hs.45514  |
| <i>EVA1</i>     | AW462459 | Hs.116651 |
| <i>EWSR1</i>    | AW466110 | Hs.374477 |
| <i>EXT1</i>     | AW464821 | Hs.184161 |
| <i>EXT2</i>     | BF044395 | Hs.75334  |
| <i>FADD</i>     | AW462721 | Hs.86131  |
| <i>FBLN2</i>    | AW463176 | Hs.198862 |
| <i>FGF1</i>     | AW461351 | Hs.278954 |
| <i>FKBP1A</i>   | AW463912 | Hs.374638 |
| <i>FLJ20399</i> | AW462158 | Hs.155049 |
| <i>FLNA</i>     | BF039876 | Hs.195464 |
| <i>FLNB</i>     | BM366074 | Hs.81008  |
| <i>FN1</i>      | AW464973 | Hs.418138 |
| <i>FNBP3</i>    | BM362048 | Hs.298735 |
| <i>GALNT1</i>   | BF041790 | Hs.277324 |
| <i>GATA3</i>    | AW464239 | Hs.169946 |
| <i>GNAI1</i>    | AW464185 | Hs.203862 |
| <i>GNAI3</i>    | AW462941 | Hs.73799  |
| <i>GNAS</i>     | AW465936 | Hs.157307 |
| <i>GNB2</i>     | AW465994 | Hs.185172 |
| <i>GNB2L1</i>   | BF044344 | Hs.5662   |
| <i>GNG10</i>    | AW462436 | Hs.433898 |
| <i>GNG11</i>    | BM361956 | Hs.83381  |
| <i>GNG12</i>    | AW463227 | Hs.8107   |
| <i>GNG5</i>     | AW465466 | Hs.436765 |

|                 |          |           |
|-----------------|----------|-----------|
| <i>GPR64</i>    | AW461648 | Hs.421137 |
| <i>GPS1</i>     | AW462925 | Hs.512102 |
| <i>GRB2</i>     | BF045356 | Hs.411366 |
| <i>GRF2</i>     | BF039690 | Hs.130969 |
| <i>GRN</i>      | AW463918 | Hs.180577 |
| <i>GRP58</i>    | AW464154 | Hs.308709 |
| <i>GSK3B</i>    | AW463509 | Hs.282359 |
| <i>GTF2I</i>    | BF042647 | Hs.408507 |
| <i>HAND1</i>    | AW462826 | Hs.152531 |
| <i>HAND2</i>    | AW461893 | Hs.388245 |
| <i>HBS1L</i>    | BF042017 | Hs.221040 |
| <i>HEYL</i>     | BF041763 | Hs.23823  |
| <i>HIF1A</i>    | BF042862 | Hs.412416 |
| <i>HLA-DRB1</i> | BF045350 | Hs.308026 |
| <i>HOXB6</i>    | BF041149 | Hs.98428  |
| <i>HRMT1L2</i>  | AW465008 | Hs.20521  |
| <i>HSHPX5</i>   | AW463296 | Hs.381329 |
| <i>IDE</i>      | BF041141 | Hs.290659 |
| <i>IER3</i>     | AW465331 | Hs.76095  |
| <i>IFNAR2</i>   | BF039697 | Hs.512211 |
| <i>IFNGR2</i>   | BF043722 | Hs.409200 |
| <i>IGBP1</i>    | BF042875 | Hs.3631   |
| <i>IGF2</i>     | AW461816 | Hs.349109 |
| <i>IGF2R</i>    | AW463608 | Hs.76473  |
| <i>IGFBP3</i>   | AW461982 | Hs.450230 |
| <i>IGSF2</i>    | AW466097 | Hs.74115  |
| <i>IL10RB</i>   | AW464606 | Hs.418291 |
| <i>IL13RA1</i>  | BF040232 | Hs.285115 |
| <i>IL15RA</i>   | AW462714 | Hs.12503  |
| <i>IL1RL1LG</i> | BF042714 | Hs.446686 |
| <i>IL6R</i>     | BF045216 | Hs.193400 |
| <i>ILK</i>      | AW464129 | Hs.6196   |
| <i>IMPA2</i>    | AW461477 | Hs.5753   |
| <i>INPP5D</i>   | BF044982 | Hs.262886 |
| <i>IPO7</i>     | BF045355 | Hs.434408 |
| <i>IPO8</i>     | AW463093 | Hs.316977 |
| <i>IQGAP1</i>   | BF045704 | Hs.1742   |
| <i>IQGAP2</i>   | AW464325 | Hs.373980 |
| <i>ISGF3G</i>   | BF039843 | Hs.1706   |
| <i>ITGAV</i>    | AW463037 | Hs.436873 |
| <i>ITPK1</i>    | BF041175 | Hs.408429 |
| <i>ITPKB</i>    | BF040180 | Hs.78877  |
| <i>JAG2</i>     | BF043815 | Hs.433445 |
| <i>JAK3</i>     | BF046565 | Hs.210387 |
| <i>KIAA0052</i> | BF044611 | Hs.274531 |
| <i>KIFC1</i>    | AW462082 | Hs.20830  |
| <i>KLF4</i>     | BF045633 | Hs.376206 |
| <i>KPNA2</i>    | BF040179 | Hs.252712 |
| <i>KRT18</i>    | AW463915 | Hs.406013 |
| <i>L3MBTL</i>   | BF042810 | Hs.300863 |
| <i>LGR8</i>     | BF040869 | Hs.348481 |
| <i>LILRB3</i>   | BF044309 | Hs.511766 |

|                  |          |           |
|------------------|----------|-----------|
| <i>LOC285148</i> | BF041569 | Hs.509314 |
| <i>LPXN</i>      | BM364429 | Hs.49587  |
| <i>LRDD</i>      | BF042206 | Hs.438986 |
| <i>LRP8</i>      | AW461615 | Hs.410784 |
| <i>LSP1</i>      | BF042923 | Hs.56729  |
| <i>LU</i>        | AW462249 | Hs.155048 |
| <i>LY96</i>      | BM366661 | Hs.69328  |
| <i>LZTR1</i>     | AW463380 | Hs.78788  |
| <i>MAD2L1</i>    | BF039606 | Hs.79078  |
| <i>MAFB</i>      | AW461546 | Hs.169487 |
| <i>MAP2K1</i>    | BF042207 | Hs.132311 |
| <i>MAP2K2</i>    | BF041942 | Hs.366546 |
| <i>MAP2K3</i>    | BF043254 | Hs.180533 |
| <i>MAP2K6</i>    | BF039637 | Hs.256924 |
| <i>MAPK1</i>     | BF040969 | Hs.324473 |
| <i>MAPK6</i>     | AW462539 | Hs.271980 |
| <i>MAPK9</i>     | AW462791 | Hs.348446 |
| <i>MAPKAPK3</i>  | BF045054 | Hs.234521 |
| <i>MCAM</i>      | AW463291 | Hs.511397 |
| <i>MEA</i>       | BF042342 | Hs.278362 |
| <i>MESDC2</i>    | BF046291 | Hs.78871  |
| <i>MEST</i>      | AW464186 | Hs.440459 |
| <i>MET</i>       | AW464296 | Hs.419124 |
| <i>MFHAS1</i>    | BF046164 | Hs.379414 |
| <i>MGC15482</i>  | BF045611 | Hs.194498 |
| <i>MKKS</i>      | BM362051 | Hs.46743  |
| <i>MKNK1</i>     | BF043214 | Hs.79516  |
| <i>MKNK2</i>     | BM366588 | Hs.512094 |
| <i>MLLT4</i>     | BF046631 | Hs.100469 |
| <i>MLP</i>       | AW464012 | Hs.75061  |
| <i>MRAS</i>      | AW463748 | Hs.349227 |
| <i>MS4A8B</i>    | BF042446 | Hs.150184 |
| <i>MSX1</i>      | AW461452 | Hs.424414 |
| <i>MTA1</i>      | AW464483 | Hs.101448 |
| <i>MTA2</i>      | AW464294 | Hs.173043 |
| <i>MX1</i>       | AW464030 | Hs.436836 |
| <i>MYLK</i>      | AW465934 | Hs.386078 |
| <i>NASP</i>      | BF039280 | Hs.446206 |
| <i>NCB5OR</i>    | BF045217 | Hs.5741   |
| <i>NCOA2</i>     | AW465013 | Hs.446678 |
| <i>NCOA4</i>     | AW465054 | Hs.422334 |
| <i>NDRG3</i>     | AW462037 | Hs.437338 |
| <i>NET1</i>      | AW461566 | Hs.25155  |
| <i>NF1</i>       | AW464087 | Hs.93207  |
| <i>NFAT5</i>     | BF043095 | Hs.86998  |
| <i>NFE2L1</i>    | BF046241 | Hs.83469  |
| <i>NFKB1</i>     | AW465881 | Hs.160557 |
| <i>NOTCH1</i>    | BF045189 | Hs.311559 |
| <i>NOTCH3</i>    | AW461762 | Hs.8546   |
| <i>NR2F2</i>     | BF040489 | Hs.347991 |
| <i>NR6A1</i>     | BF045456 | Hs.195161 |
| <i>NRAS</i>      | BF043255 | Hs.260523 |

|                 |          |           |
|-----------------|----------|-----------|
| <i>OSTF1</i>    | AW463947 | Hs.47011  |
| <i>OXAIL</i>    | BF044188 | Hs.151134 |
| <i>P2RX4</i>    | AW464680 | Hs.321709 |
| <i>PAFAH1B1</i> | AW465409 | Hs.77318  |
| <i>PARG1</i>    | BF043143 | Hs.430919 |
| <i>PCTK1</i>    | BF046398 | Hs.171834 |
| <i>PDCD6IP</i>  | AW464094 | Hs.9663   |
| <i>PDGFRA</i>   | BM362352 | Hs.74615  |
| <i>PDK3</i>     | AW466012 | Hs.193124 |
| <i>PDK4</i>     | AW462035 | Hs.8364   |
| <i>PECAMI</i>   | AW462978 | Hs.78146  |
| <i>PER2</i>     | AW464080 | Hs.410692 |
| <i>PES1</i>     | BF040094 | Hs.132037 |
| <i>PIAS1</i>    | AW464941 | Hs.75251  |
| <i>PIP5K1A</i>  | BF044038 | Hs.149255 |
| <i>PIP5K2A</i>  | BM366482 | Hs.108966 |
| <i>PITPNM1</i>  | BM365100 | Hs.93837  |
| <i>PLAA</i>     | BF040868 | Hs.27182  |
| <i>PLAU</i>     | AW462038 | Hs.77274  |
| <i>PLAUR</i>    | AW463210 | Hs.179657 |
| <i>POMC</i>     | AW461746 | Hs.1897   |
| <i>PPAP2A</i>   | BF041418 | Hs.482121 |
| <i>PPARG</i>    | BF044506 | Hs.387667 |
| <i>PPIC</i>     | AW464749 | Hs.110364 |
| <i>PPP2R5A</i>  | BF042129 | Hs.155079 |
| <i>PPP2R5C</i>  | AW464337 | Hs.249955 |
| <i>PPP3CB</i>   | BF046424 | Hs.187543 |
| <i>PRDM4</i>    | BF046524 | Hs.21807  |
| <i>PRKCL1</i>   | AW465745 | Hs.2499   |
| <i>PRKRIR</i>   | BF039185 | Hs.177574 |
| <i>PRL</i>      | AW461987 | Hs.1905   |
| <i>PTK2B</i>    | BF040914 | Hs.405474 |
| <i>PTPLA</i>    | BF046141 | Hs.114062 |
| <i>PTPN1</i>    | BF041221 | Hs.418004 |
| <i>PTPN11</i>   | AW463332 | Hs.83572  |
| <i>PTPNS1</i>   | BM366882 | Hs.156114 |
| <i>PTPRF</i>    | AW465468 | Hs.75216  |
| <i>PTPRG</i>    | BF044748 | Hs.89627  |
| <i>PTPRH</i>    | AW463019 | Hs.179770 |
| <i>QKI</i>      | AW461364 | Hs.153355 |
| <i>RAB10</i>    | AW463994 | Hs.236494 |
| <i>RAB11A</i>   | AW462549 | Hs.75618  |
| <i>RAB11B</i>   | BF042141 | Hs.433888 |
| <i>RAB13</i>    | AW465441 | Hs.525461 |
| <i>RAB14</i>    | BF046570 | Hs.5807   |
| <i>RAB18</i>    | BF040014 | Hs.414357 |
| <i>RAB1A</i>    | AW462924 | Hs.227327 |
| <i>RAB20</i>    | BF042479 | Hs.179791 |
| <i>RAB22A</i>   | AW465612 | Hs.281117 |
| <i>RAB25</i>    | BF044476 | Hs.150826 |
| <i>RAB2L</i>    | BM363900 | Hs.170160 |
| <i>RAB31</i>    | AW464597 | Hs.223025 |

|                 |          |           |
|-----------------|----------|-----------|
| <i>RAB32</i>    | AW463501 | Hs.32217  |
| <i>RAB33A</i>   | AW464044 | Hs.56294  |
| <i>RAB4B</i>    | AW464303 | Hs.25367  |
| <i>RAB8A</i>    | BF045070 | Hs.5947   |
| <i>RAB9A</i>    | AW465952 | Hs.444327 |
| <i>RABL2A</i>   | BM364540 | Hs.446425 |
| <i>RABL3</i>    | AW464204 | Hs.132355 |
| <i>RAC1</i>     | BF046018 | Hs.413812 |
| <i>RAC3</i>     | AW466155 | Hs.45002  |
| <i>RALA</i>     | BF041191 | Hs.6906   |
| <i>RALB</i>     | BF043508 | Hs.348024 |
| <i>RALBP1</i>   | BF040645 | Hs.75447  |
| <i>RALGDS</i>   | BF046679 | Hs.106185 |
| <i>RAN</i>      | BF043183 | Hs.10842  |
| <i>RANGAP1</i>  | AW464051 | Hs.183800 |
| <i>RASD1</i>    | AW463433 | Hs.25829  |
| <i>RASGEF1A</i> | AW463265 | Hs.125293 |
| <i>RFP</i>      | AW464880 | Hs.440382 |
| <i>RFP2</i>     | BF041433 | Hs.436922 |
| <i>RGS10</i>    | BF045842 | Hs.82280  |
| <i>RGS12</i>    | BF044618 | Hs.434933 |
| <i>RGS2</i>     | BM363950 | Hs.78944  |
| <i>RGS20</i>    | AW462880 | Hs.141492 |
| <i>RHEB</i>     | AW462170 | Hs.279903 |
| <i>RIPK1</i>    | AW466013 | Hs.390758 |
| <i>RIPK2</i>    | AW465726 | Hs.103755 |
| <i>RIT1</i>     | BF044687 | Hs.446472 |
| <i>ROD1</i>     | AW461418 | Hs.374634 |
| <i>RPL10A</i>   | BF044652 | Hs.448396 |
| <i>RPS27</i>    | BM365835 | Hs.337307 |
| <i>RPS6KA1</i>  | BM365203 | Hs.149957 |
| <i>RPS6KA3</i>  | AW465031 | Hs.188361 |
| <i>RPS6KA5</i>  | BF045195 | Hs.109058 |
| <i>RPS6KB1</i>  | AW463070 | Hs.86858  |
| <i>RRAD</i>     | AW462180 | Hs.1027   |
| <i>RRBP1</i>    | BF045657 | Hs.98614  |
| <i>RSU1</i>     | BF045468 | Hs.477460 |
| <i>RYK</i>      | AW464021 | Hs.285346 |
| <i>S100A10</i>  | BF043901 | Hs.143873 |
| <i>SAS</i>      | AW466213 | Hs.50984  |
| <i>SC65</i>     | AW463323 | Hs.511753 |
| <i>SCYE1</i>    | BF044135 | Hs.105656 |
| <i>SDF2</i>     | BF042332 | Hs.118684 |
| <i>SFN</i>      | AW465454 | Hs.184510 |
| <i>SFRS11</i>   | BF044406 | Hs.443458 |
| <i>SH3BP5</i>   | AW461956 | Hs.109150 |
| <i>SH3YL1</i>   | BF046534 | Hs.147365 |
| <i>SIAH2</i>    | AW462510 | Hs.20191  |
| <i>SIRT5</i>    | BF044489 | Hs.282331 |
| <i>SIRT7</i>    | AW463779 | Hs.184447 |
| <i>SKB1</i>     | AW465024 | Hs.367854 |
| <i>SKIV2L</i>   | BF046548 | Hs.89864  |

|                |          |           |
|----------------|----------|-----------|
| <i>SLC25A3</i> | AW464441 | Hs.290404 |
| <i>SOS1</i>    | BF044102 | Hs.326392 |
| <i>SPA17</i>   | AW463988 | Hs.286233 |
| <i>SPATA7</i>  | BF040172 | Hs.414464 |
| <i>SPEC2</i>   | AW462199 | Hs.5985   |
| <i>SRF</i>     | BF039881 | Hs.444086 |
| <i>SSR4</i>    | AW461390 | Hs.409223 |
| <i>STAM</i>    | BF040813 | Hs.441498 |
| <i>STAMBP</i>  | AW463948 | Hs.12479  |
| <i>STAT1</i>   | BF043726 | Hs.21486  |
| <i>STC1</i>    | BF043835 | Hs.25590  |
| <i>STMN1</i>   | BF042135 | Hs.209983 |
| <i>SYNCRIP</i> | BF043017 | Hs.436376 |
| <i>TACSTD1</i> | AW461992 | Hs.692    |
| <i>TACSTD2</i> | AW464668 | Hs.23582  |
| <i>TBL1Y</i>   | BF046522 | Hs.326787 |
| <i>TBRG4</i>   | BF041588 | Hs.231411 |
| <i>TBX3</i>    | BF040696 | Hs.368748 |
| <i>TEK</i>     | BF040603 | Hs.89640  |
| <i>TFAP2A</i>  | BF039106 | Hs.210911 |
| <i>TGFBR3</i>  | BF042623 | Hs.342874 |
| <i>THBS1</i>   | AW461636 | Hs.164226 |
| <i>THOC1</i>   | BF039941 | Hs.1540   |
| <i>TLE1</i>    | BM362897 | Hs.406491 |
| <i>TLE3</i>    | BF045501 | Hs.287362 |
| <i>TLE4</i>    | AW462813 | Hs.494269 |
| <i>TLN2</i>    | BF041839 | Hs.137129 |
| <i>TM4SF12</i> | BF045969 | Hs.16529  |
| <i>TM4SF13</i> | AW461553 | Hs.364544 |
| <i>TM4SF2</i>  | BF040688 | Hs.439586 |
| <i>TM4SF8</i>  | AW465786 | Hs.259212 |
| <i>TNS</i>     | AW465869 | Bt.5309   |
| <i>TNS</i>     | AW466065 | Hs.512710 |
| <i>TOB1</i>    | BF039513 | Hs.178137 |
| <i>TP53BP2</i> | AW466006 | Hs.44585  |
| <i>TPD52</i>   | BF044016 | Hs.162089 |
| <i>TPX2</i>    | BM364843 | Hs.9329   |
| <i>TRAF3</i>   | BF039592 | Hs.297660 |
| <i>TRAF4</i>   | AW465678 | Hs.8375   |
| <i>TRAF6</i>   | BF045658 | Hs.444172 |
| <i>TRIM37</i>  | AW464825 | Hs.8164   |
| <i>TRIP10</i>  | BF043967 | Hs.445226 |
| <i>TRIP15</i>  | AW466124 | Hs.30212  |
| <i>TRRAP</i>   | AW462891 | Hs.203952 |
| <i>TSPAN-1</i> | AW461395 | Hs.38972  |
| <i>TTRAP</i>   | BF045278 | Hs.210628 |
| <i>TXN</i>     | BF040860 | Hs.395309 |
| <i>TXNIP</i>   | AW463867 | Hs.179526 |
| <i>TXNL</i>    | AW463695 | Hs.114412 |
| <i>TXNRD1</i>  | BM362012 | Hs.434367 |
| <i>TYRO3</i>   | AW462223 | Hs.381282 |
| <i>UNC119</i>  | BF044751 | Hs.410455 |



|                |          |           |
|----------------|----------|-----------|
| <i>USP11</i>   | AW463740 | Hs.171501 |
| <i>WASL</i>    | BF046692 | Hs.182469 |
| <i>WBP2</i>    | AW463224 | Hs.231840 |
| <i>WBSCR14</i> | BF042632 | Hs.285681 |
| <i>WDR13</i>   | AW464387 | Hs.12142  |
| <i>WDR5</i>    | AW464559 | Hs.397638 |
| <i>WDR7</i>    | BF044912 | Hs.428344 |
| <i>WDR8</i>    | AW463239 | Hs.31714  |
| <i>Whsc1</i>   | BF046444 | Mm.19892  |
| <i>WHSC1</i>   | AW463891 | Hs.110457 |
| <i>WNT4</i>    | AW462911 | Hs.302428 |
| <i>WNT6</i>    | AW461778 | Hs.29764  |
| <i>XAB1</i>    | AW465700 | Hs.18259  |
| <i>XLKD1</i>   | BF041814 | Hs.17917  |
| <i>XRCC1</i>   | AW462822 | Hs.98493  |
| <i>YWHAB</i>   | AW462500 | Hs.279920 |
| <i>YWHAQ</i>   | AW464408 | Hs.74405  |
| <i>ZFP95</i>   | BF043911 | Hs.110839 |
| <i>ZNF12</i>   | BM364858 | Hs.102397 |
| <i>ZNF259</i>  | BF044791 | Hs.7165   |

---

\*Some sequences do not have human UniGene IDs and are annotated with the Cattle UniGene names or are previously unannotated bovine sequences.
