# Supplementary material
Source: PubMed Central journal article supplement (PMC1308920)
Supplement: pnas_0508952102_7.pdf [file pnas_0508952102_7.pdf]

**Table 9. Primers and probes for quantitative real-time RT-PCR**

| <b>Symbol</b>  | <b>Seq. Identifier</b> | <b>Forward Primer (5'-3')</b> | <b>Probe (5'FAM-3'TAMRA)</b>     | <b>Reverse Primer (5'-3')</b> |
|----------------|------------------------|-------------------------------|----------------------------------|-------------------------------|
| <i>ACTB</i>    | AW464237               | GTCATCACCATCGGCAATGA          | TCCGCTGCCCTGAGGCTCTCTTC          | ATTCCATGCCCAGGAAGGA           |
| <i>COL5A2</i>  | AW463762               | ACGCTTGCCCATCATAGATCTT        | CCCTGTGGATGTTGGCAGTACAGACCA      | CCCAATTTCAACGCCAAATT          |
| <i>VIM</i>     | BF042212               | GTCACCTGCGCGAATACCA           | CCTGCTGAATGTCAAGATGGCGCTC        | TGTAGGTGGCGATCTCGATGT         |
| <i>HDAC1</i>   | BF040519               | AGGGCACACATTACTTTTCTAGTAGCT   | CTTGCAACCCGTCCCTCCCAAAC          | TCCCTTTTACCCAGTACCCATTAG      |
| <i>PECAM1</i>  | AW462978               | AACAGACGGGCTGGTTAGTTTC        | CACACAGCCTGCCTCCAGCAA            | CTCCCCGAGGATGCTCCAA           |
| <i>DNMT3B</i>  | AW464642               | CCACACCCCTCCAGGCTACT          | TGCAGGCACAGGTCCCCAGTGTAAAC       | AGTGCGAGGACTGTGCTTCTG         |
| <i>CITED1</i>  | AW465609               | CAGCATCACCTCCCACCAA           | TCCAACCTTCTGCCAAGACTCTGAAATGCC   | GGTGCCACCCTTGACATCA           |
| <i>ACO1</i>    | AW465214               | AGTGACCTCAAAGCACAGTTGGT       | CAAAGCCTTTTCGGGCCTTCCTGTT        | GCTGCTACTTAGTGGTATGATGTTCTG   |
| <i>TFAP2A</i>  | BF039106               | TTCTAAAAGTTTTCCCTCTTCAAGGT    | AGCGACTAACTTGAATTTTCTCTGGCAACACG | GAACACTGATTCCTTATAGAATTGTGA   |
| <i>CD81</i>    | AW465486               | CCACTCACACGCCCTACA            | ACGTCAGCCCCAAAAGGACAATTAACAGG    | TGAGGTTTTGTTTCATGTCCTGAA      |
| <i>IHKP2</i>   | AW464276               | GCTGGAGCGACAAGAATCCTA         | TCTACTCAAGCTCCCTGCTGATCAT        | CCGTCCTTGCCGTCATA             |
| <i>DNAJC10</i> | AW463952               | CAGCCATGTCTAGCAGTATTTAAAGG    | CAGGGAACCAAAGAATTTGAAATTCATCATGG | GGCAAAGGCAAGTATGTCATATAGAA    |
| <i>HRH1</i>    | AW464562               | GCTGTGCCAGGTTGATGTC           | TTAAGCCCCATGACACCCACAACA         | TTTGCTTTTCTCATAACACCATTCTC    |
