# Supplementary material
Source: PubMed Central journal article supplement (PMC1308920)

**A**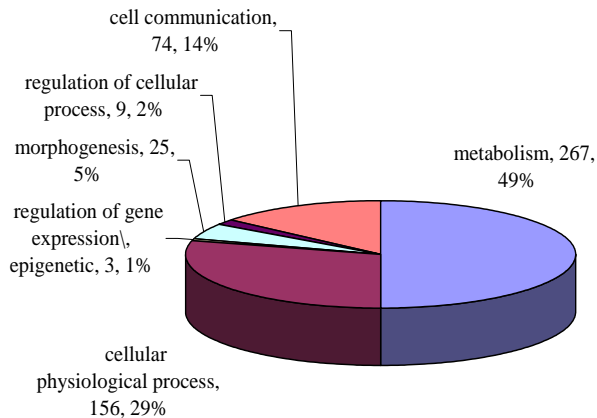**B**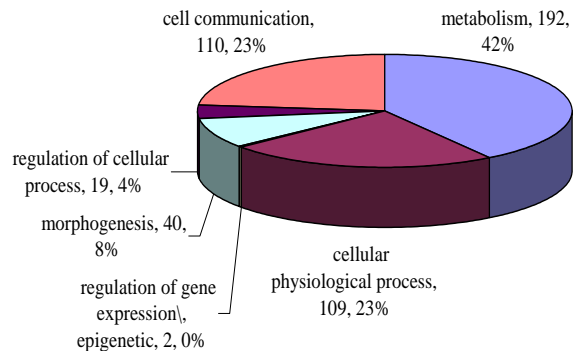**C**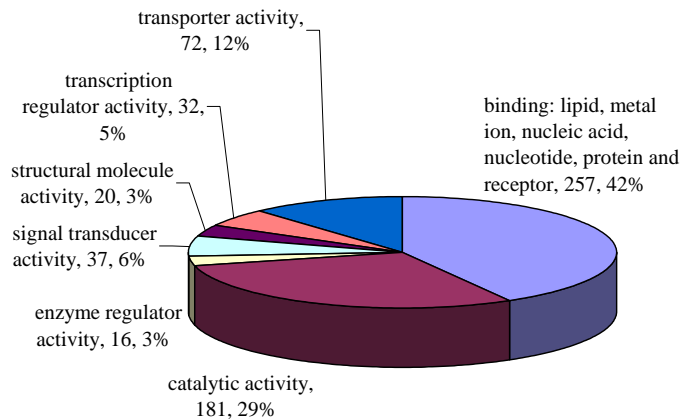**D**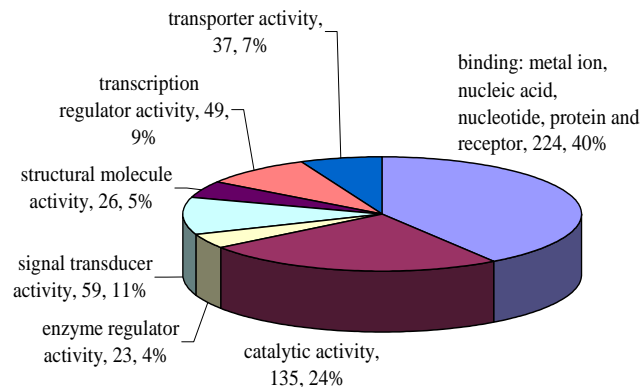

Supplement: pnas_0508952102_1.pdf [file pnas_0508952102_1.pdf]
